# Supplementary material for: Cohort profile: the Acquired Brain Injury Community REhabilitation and Support Services OuTcomes CohoRT (ABI-RESTaRT), Western Australia, 1991–2020
Source: PubMed Central journal article supplement — BMJ Open. 2021 Sep 2;11(9):e052728. doi: 10.1136/bmjopen-2021-052728 (PMC8413932; doi:10.1136/bmjopen-2021-052728), 2021-09-02
Supplement: bmjopen-2021-052728.draft_revisions.pdf [file bmjopen-2021-052728.draft_revisions.pdf]

# BMJ Open

BMJ Open is committed to open peer review. As part of this commitment we make the peer review history of every article we publish publicly available.

When an article is published we post the peer reviewers' comments and the authors' responses online. We also post the versions of the paper that were used during peer review. These are the versions that the peer review comments apply to.

The versions of the paper that follow are the versions that were submitted during the peer review process. They are not the versions of record or the final published versions. They should not be cited or distributed as the published version of this manuscript.

BMJ Open is an open access journal and the full, final, typeset and author-corrected version of record of the manuscript is available on our site with no access controls, subscription charges or pay-per-view fees (<http://bmjopen.bmj.com>).

If you have any questions on BMJ Open's open peer review process please email [info.bmjopen@bmj.com](mailto:info.bmjopen@bmj.com)

# BMJ Open

## Cohort Profile: The Acquired Brain Injury Community Rehabilitation and Support Services Outcomes Cohort (ABI-REStART) Study, Western Australia, 1991-2020

|                               |                                                                                                                                                                                                                                                                                                     |
|-------------------------------|-----------------------------------------------------------------------------------------------------------------------------------------------------------------------------------------------------------------------------------------------------------------------------------------------------|
| Journal:                      | <i>BMJ Open</i>                                                                                                                                                                                                                                                                                     |
| Manuscript ID                 | bmjopen-2021-052728                                                                                                                                                                                                                                                                                 |
| Article Type:                 | Cohort profile                                                                                                                                                                                                                                                                                      |
| Date Submitted by the Author: | 24-Apr-2021                                                                                                                                                                                                                                                                                         |
| Complete List of Authors:     | Mann, Georgina; Brightwater Care Group, Brightwater Research Centre<br>Troeng, Lakkhina; Brightwater Care Group, Brightwater Research Centre<br>Wagland, Janet; Brightwater Care Group, Community and Disability Services<br>Martini, Angelita; Brightwater Care Group, Brightwater Research Centre |
| Keywords:                     | REHABILITATION MEDICINE, Stroke < NEUROLOGY, Neurological injury < NEUROLOGY                                                                                                                                                                                                                        |
|                               |                                                                                                                                                                                                                                                                                                     |

SCHOLARONE™  
Manuscripts

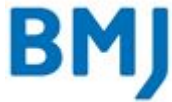

I, the Submitting Author has the right to grant and does grant on behalf of all authors of the Work (as defined in the below author licence), an exclusive licence and/or a non-exclusive licence for contributions from authors who are: i) UK Crown employees; ii) where BMJ has agreed a CC-BY licence shall apply, and/or iii) in accordance with the terms applicable for US Federal Government officers or employees acting as part of their official duties; on a worldwide, perpetual, irrevocable, royalty-free basis to BMJ Publishing Group Ltd ("BMJ") its licensees and where the relevant Journal is co-owned by BMJ to the co-owners of the Journal, to publish the Work in this journal and any other BMJ products and to exploit all rights, as set out in our [licence](#).

The Submitting Author accepts and understands that any supply made under these terms is made by BMJ to the Submitting Author unless you are acting as an employee on behalf of your employer or a postgraduate student of an affiliated institution which is paying any applicable article publishing charge ("APC") for Open Access articles. Where the Submitting Author wishes to make the Work available on an Open Access basis (and intends to pay the relevant APC), the terms of reuse of such Open Access shall be governed by a Creative Commons licence – details of these licences and which [Creative Commons](#) licence will apply to this Work are set out in our licence referred to above.

Other than as permitted in any relevant BMJ Author's Self Archiving Policies, I confirm this Work has not been accepted for publication elsewhere, is not being considered for publication elsewhere and does not duplicate material already published. I confirm all authors consent to publication of this Work and authorise the granting of this licence.

Cohort Profile: ABI-REStART, 1991-2020

1

**Cohort Profile: The Acquired Brain Injury Community Rehabilitation and Support  
Services Outcomes Cohort (ABI-REStART) Study, Western Australia, 1991-2020**

Georgina MANN, PhD<sup>1</sup>, Lakkhina TROEUNG, PhD<sup>1</sup>, Janet WAGLAND, BSc<sup>2</sup>, Angelita  
MARTINI, PhD<sup>1</sup>

<sup>1</sup>Brightwater Research Centre, Brightwater Care Group, Perth, Australia

<sup>2</sup>Community and Disability Services, Brightwater Care Group, Perth, Australia

Correspondence to: Dr. Georgina Mann

Research Officer, Brightwater Research Centre

355 Scarborough Beach Rd, Osborne Park WA 6017 Australia

+ 61 8 9202 3561

[Georgina.Mann@brightwatergroup.com](mailto:Georgina.Mann@brightwatergroup.com)

Word count: 3,084

## Abstract

**Purpose:** Transition into the community following acute management of acquired brain injury (ABI) is a critical part of recovery. Post-acute rehabilitation and transitional care can significantly improve outcomes. The Acquired Brain Injury Community REhabilitation and Support Services OuTcomes CohoRT (ABI-REStART) is a novel whole-population cohort formed to better understand the needs of individuals with ABI receiving post-acute rehabilitation and disability services in Western Australia (WA), and to improve their outcomes. To do this a unique combination of i) internal clinical/rehabilitation data, and ii) externally linked health data from the WA Data Linkage System was used, including hospitalisations, emergency department presentations, mental health service use, and death records, to measure longitudinal needs and outcomes of individuals with ABI over 29 years, making this the largest, most diverse post-acute ABI cohort in Australia to date.

**Participants:** Whole-population cohort of individuals ( $n = 1,011$ ) with an ABI who received post-acute community-based neurorehabilitation or disability support services through Brightwater Care Group from 1991-2020.

**Findings to date:** Comprehensive baseline demographic, clinical and rehabilitation data, outcome measures and linked health data have been collected and analysed. Non-traumatic brain injury (e.g. stroke, hypoxia) was the main diagnostic group (54.9%,  $n=555$ ), followed by traumatic brain injury (34.9%,  $n=353$ ) and eligible neurologic conditions (10.2%,  $n=103$ ). Mean age at admission was 45.4 years, and 67.5% were male ( $n=682$ ). The cohort demonstrated significant heterogeneity, socially and clinically, with differences between ABI groups across a number of domains.

**Future plans:** ABI-REStART is a dynamic whole-population cohort that will be updated over time as individuals enrol in the service. Future analyses will assess longitudinal brain injury outcomes, the changing health and social needs of individuals with ABI, and evaluate and inform post-acute services to best support these individuals.

**Registration:** This cohort is not linked to a clinical trial, and is not registered.

### Article Summary

- ABI-RESTART is the largest Australian post-acute neurorehabilitation and disability support cohort to date with a 29 year follow-up period.
- The combined use of internal clinical and rehabilitation data and linked health data provides a detailed picture of ABI that could not be derived from a single data source, with key measures including functional independence, health status and comorbidities, goal attainment, mental health and well-being, quality of life, and mortality, offering a unique, holistic understanding of the needs and outcomes of individuals with ABI
- The cohort represents a diverse and complex population including individuals with non-traumatic brain injury, traumatic brain injury, and eligible neurologic conditions, providing a diverse range of brain injury experiences.
- The unique study framework follows each cohort member from pre-injury to long-term follow-up after discharge from post-acute services, with a minimum 10-year lookback period (starting from 1981) and a mean follow-up time of 8.4 years following discharge.
- A state-based data linkage register was used, so pre-admission or post-discharge follow-up data for cohort members based interstate or overseas will not be captured, and all clients were accessing services at a single organisation which may reduce the generalisability of findings.

## Introduction

Acquired brain injury (ABI) is one of the leading causes of death and disability in Australia<sup>1</sup>. Defined as any damage to the brain occurring after birth, ABI can be traumatic (caused by extrinsic forces to the head) or non-traumatic (e.g. stroke, drug misuse, tumour, hypoxia/anoxia). Estimates suggest 2% of the population of Western Australia (WA) are living with an ABI<sup>2</sup>. The consequences of ABI are complex and difficult to predict, but often lead to a range of impairments in cognitive, physical and psychosocial functioning<sup>1-4</sup>. Up to 75% of brain injuries occur in adults under 65 years of age<sup>3</sup>, resulting in difficulties that can impact working ability, social engagement and community integration<sup>5-7</sup>.

Regaining independence and/or meaningful participation in life following an ABI is achievable. Transition back into the community following acute management of ABI in hospital is a critical phase of recovery, and adjustment during transition predicts longer-term outcomes and overall recovery from brain injury<sup>8,9</sup>. Post-acute care is important throughout this often difficult and stressful transition period<sup>9</sup>. Individuals with inadequate supports risk poorer outcomes including development of a depressive disorder<sup>8</sup>, re-hospitalisation or institutionalisation<sup>9</sup> and reduced likelihood of returning to work<sup>5</sup>.

Despite the importance of post-acute care for individuals with an ABI, little empirical evidence is available to enable service planning and policy development for this poorly-understood cohort. A number of community-based neurorehabilitation cohort studies examining the outcomes of individuals with ABI after rehabilitation exist in Australia<sup>10-13</sup>. While this research has demonstrated the value of community-based rehabilitation, these cohort studies have small samples (<200), and short follow-up times (<3years). Long-term research examining the experiences of individuals accessing post-acute ABI services and the effectiveness of different types of post-acute care is required to ensure the best outcomes for individuals.

## The Acquired Brain Injury Community REhabilitation and Support Services

Outcomes Cohort (ABI-REStART) study is the largest in Australia to date. This cohort includes 1,011 people with ABI who received post-acute rehabilitation or support services at Brightwater Care Group in WA from 1991-2020. Brightwater has been a main provider of post-acute community-based disability services for people with acquired brain injury in WA since 1991<sup>14</sup>, with the goal to support people to meaningfully 'restart' their lives in the community after ABI.

The ABI-REStART research program uses a unique combination of internal clinical and rehabilitation data and externally linked hospital, emergency department, mental health and mortality data from the West Australian Data Linkage System<sup>15</sup>. This enables longitudinal examination of the needs and outcomes of individuals with ABI over 29 years, making this the longest follow-up of individuals with ABI undergoing post-acute care in Australia to date<sup>10-12</sup>. This novel framework follows each cohort member from pre-injury, through acute injury, to long-term community-based follow-up after discharge from post-acute services. The aim of the ABI-REStART research program will focus on understanding the complex health and social needs of people with ABI during post-acute care, and identify predictors of short- and long-term outcomes to facilitate effective service planning and delivery.

This cohort profile paper: 1) describes the background and formation of ABI-REStART, 2) outlines data sources, key variables and outcomes, 3) presents baseline sociodemographic and clinical characteristics, and 4) outlines planned research for the cohort.

### **Cohort Description**

#### **Cohort Design and Eligibility**



ABI-REStART is a retrospective whole-population cohort comprising all clients of Brightwater Care Group's ABI programs and services (excluding respite) from inception on March 15, 1991 to December 31, 2020 ( $n=1,011$ ). Each individual's entry date into the cohort represents the date of their index admission to Brightwater's community-based ABI services. The study cohort will be periodically updated with new admissions to allow a dynamic cohort of individuals to be followed through changing services over time, a unique possibility not seen in previous cohorts.

The cohort consists of individuals with diverse brain injuries, including traumatic brain injuries (TBI), non-traumatic brain injuries (NTBI) and eligible neurologic conditions, defined by the Australian Rehabilitation Outcomes Centre (AROC) impairment codes<sup>16</sup>. Each individual's AROC diagnosis represents their primary brain injury diagnosis at entry to Brightwater, and not necessarily their index brain injury, meaning that individuals may have had prior brain injuries. Table S1 displays the AROC diagnoses eligible for Brightwater admission. Individuals with congenital neurologic conditions (e.g. cerebral palsy, spina bifida) or intellectual disabilities are eligible for services at Brightwater, but were excluded from the cohort. Admissions are accepted any time since injury, most often in the sub-acute (3-12 months post-injury) or chronic phases (>12 months post-injury)<sup>17,18</sup>.

### **Cohorts, Setting and Programs**

The overall cohort is comprised of four sub-cohorts based on year of admission to services: 1991-2002, 2003-2007, 2008-2013, and 2014-2020. These sub-cohorts reflect periods of service delivery change across the different programs. The five different community-based programs are summarized below, ranging from full-time residential neurorehabilitation to casual home-based supports.

#### ***Transitional Rehabilitation Program***

1  
2  
3 The *Oats Street* rehabilitation centre is a purpose-built community-based residential  
4 facility providing evidence-based post-acute transitional rehabilitation services for  
5 individuals with ABI and/or eligible neurologic conditions. The program is funded by the  
6 West Australian Department of Health and can support up to 43 live-in residents aged 18-65,  
7 across 8 group houses and 8 independent living units, plus 10 additional home-based clients.  
8 The Transitional Rehabilitation Program has a typical duration of 12-24 months, and aims to  
9 enable clients to regain the skills to live independently in the community. Clients participate  
10 in person-centred rehabilitation tailored to their individual goals, and are supported by an  
11 integrated multidisciplinary team of medical and allied health professionals.  
12  
13  
14  
15  
16  
17  
18  
19  
20  
21  
22  
23

24 The Transitional Rehabilitation Program is based on a novel model of care: Staged  
25 Community-Based Brain Injury Rehabilitation. Post-acute therapy and care services are  
26 provided in a stage-based approach to support a client's continued recovery from ABI over  
27 time<sup>19-21</sup>. On admission, clients are allocated to a house with levels of assistance appropriate  
28 for their needs, from 24 hour continuous care to full independence, and graduate through  
29 stages with decreasing levels of support as their independence and functional abilities  
30 improve<sup>21</sup>. The program is able to support all stages of brain injury rehabilitation, from  
31 profound physical disability (including those minimally conscious) to higher-level cognitive  
32 rehabilitation.  
33  
34  
35  
36  
37  
38  
39  
40  
41  
42  
43  
44

#### 45 ***Transitional Accommodation Program***

46  
47 The Transitional Accommodation Program is funded by the West Australian  
48 Department of Health and provides short-term support for individuals with ABI who are  
49 medically stable following hospital discharge. Referrals must come from a Perth metropolitan  
50 public hospital, and clients receive transitional care and short-term accommodation while  
51  
52  
53  
54  
55  
56  
57  
58  
59  
60

they are supported to seek longer-term accommodation or make adjustments to existing homes<sup>22</sup>.

### ***Supported Independent Living***

Supported Independent Living is a supported accommodation program for individuals with ABI, with the Australian Government's National Disability Insurance Scheme (NDIS)<sup>23</sup> or private funding, who require additional supports but do not seek neurorehabilitation<sup>24</sup>.

Individuals in this program live across 8 shared houses for people with disability throughout the Perth metropolitan area and access supports appropriate for their lifestyle and goals.

### ***Capacity Building***

Capacity Building offers home-based supports to individuals with ABI with NDIS funding. Supports include specialist neurorehabilitation therapy services, support coordination, equipment and assistive technology, and behavioural assessment and support. Capacity Building clients have individually tailored rehabilitation or lifestyle goals that are achieved while living off-site.

### ***Home and Community Care Social Skills***

The Home and Community Care Social Skills program provides support, privately or with NDIS funding, for social engagement and activities as well as in-home care as required. This program is for individuals with ABI who are at risk of social isolation or need support around the home to maintain their independence.

### ***Data Sources and Follow-Up Time***

Figure 1a summarizes the data sources for ABI-REStART. The study uses a unique combination of internal clinical and rehabilitation data, and externally linked data collections from the WA Department of Health. Internal electronic medical records for each cohort

1  
2  
3 member were probabilistically linked through the WA Data Linkage System<sup>15</sup> to four  
4  
5 external health data collections. We obtained data on hospitalizations (hospital morbidity data  
6  
7 collection; 1981-2020), emergency department (ED) presentations (ED data collection; 2002-  
8  
9 2020), deaths (mortality register, 1991-2020) and mental health (mental health information  
10  
11 system; 1981-2020). The combination of internal and external data sources allows  
12  
13 triangulation of information to ensure higher accuracy, continuity, and completeness than  
14  
15 could be derived from a single source.  
16  
17

18  
19 Figure 1b summarizes the ABI-REStART study design and follow-up time. The  
20  
21 unique study framework follows each cohort member from pre-injury, acute care, post-acute  
22  
23 care and long-term follow-up after discharge from post-acute services. For all cohort  
24  
25 members, a minimum 10-year pre-admission lookback period is available to examine pre-  
26  
27 injury morbidity patterns and acute care details. Linked data are obtained up to December 31,  
28  
29 2020, with a mean follow-up time of 8.4 years (range 0y-29.2y) following discharge from  
30  
31 community-based services for each cohort member. The study cohort and data linkage will be  
32  
33 periodically updated with new admissions to allow cohort growth and dynamic follow-up.  
34  
35  
36

### 37 **Key Measures, Variables and Outcomes**

38  
39 Key measures and variables available for the ABI-REStART study are summarized in  
40  
41 Table 1. Variables are primarily derived from clinical and administrative data collected as  
42  
43 part of routine service provision. Key variables span five categories (Admissions,  
44  
45 Demographics, Clinical, Rehabilitation, and Psychosocial), offering a unique, holistic  
46  
47 understanding of the needs and outcomes of individuals with ABI. Outcomes for each cohort  
48  
49 member include functional independence, health status and comorbidities, goal attainment,  
50  
51 mental health and well-being, quality of life, and mortality, the most comprehensive set of  
52  
53 measures available for a cohort of this kind to date.  
54  
55  
56  
57  
58  
59  
60

## Ethics

Clients provided consent for their de-identified information to be used for research purposes as part of the conditions of service upon admission. Ethics approval for this study was granted by the University of Western Australia Human Research Ethics Committee (RA/4/1/9232) and the West Australian Department of Health Human Research Ethics Committee (RGS0000002894).

## Statistical Analysis

Extraction and analysis of baseline data was completed in February 2021. Baseline data were analysed using STATA 16.0<sup>25</sup>. Primary analyses were tested against an alpha level of 0.05 (uncorrected, two-tailed). Descriptive statistics were calculated and presented as mean  $\pm$  standard deviation, or count (percentage). Independent samples t-tests, two-way ANOVAs and  $\chi^2$  analyses were used to compare differences in continuous and categorical outcomes, respectively. Bonferroni correction was used for multiple comparisons.

## Patient and public involvement

Patients or public were not involved in the development of the research question and study design or conducting the present study.

## Findings to date

### Sociodemographic Characteristics

Table 2 summarizes the baseline sociodemographic characteristics of ABI-REStART. Mean age at admission was  $45.4 \pm 15.5$  years (range: 14.9y–93.2y), with 6.2% aged over 65 (n=63). Male clients (67.5%) outnumbered female clients (32.5%). The relatively young age and predominantly male cohort is consistent with other profiles of individuals seeking ABI services<sup>10–12</sup>. The majority of the cohort was born in Australia (64.7%), with 3.4% of clients of Indigenous and/or Torres Strait Islander background. Most of the cohort lived in a major

city (84.3%) and were between *average disadvantage* and *least disadvantaged* levels of the IRSD before admission (76.5%).

### Brain Injury Characteristics

Table 3 summarizes AROC diagnostic categories for the cohort. The majority had an NTBI (54.9%; 555 of 1,011) with stroke (52.6%; 292 of 555) comprising over half of NTBI diagnoses. TBI accounted for 34.9% of the cohort (353 of 1,011).

Table 4 summarizes brain injury characteristics for the cohort. There were significant differences in gender composition of the diagnostic groups ( $p < 0.001$ ), with more male than female clients with TBI and stroke. Gender differences were smaller in the other NTBI and neurologic groups.

There were significant differences in age at admission and ABI type ( $p < .001$ ). Clients with TBI were significantly younger than those in all other ABI groups at admission (largest corrected  $p < 0.001$ ). Consistent with prior literature, TBI clients were more likely to be male and significantly younger than those with other ABIs<sup>26,27</sup>. Those presenting with stroke and neurological conditions were significantly older than those with other NTBI (largest corrected  $p < .006$ ), likely reflecting increasing age-related stroke risk<sup>28,29</sup>.

Clients with neurologic conditions or TBI primarily entered post-acute rehabilitation in the chronic injury phase, whereas most clients with stroke entered services during the sub-acute phase. This may be related to longer hospital admissions for TBI clients, but may also demonstrate the benefits of specialized stroke services in managing acute stroke<sup>30</sup>, quickly directing people to rehabilitation. Bilateral injuries (58.9%) were the most common overall, and for TBI (62.3%), other NTBI (80.2%) and neurologic condition groups (97.1%). The majority of strokes were unilateral (72.9%), with left hemispheric more common than right hemispheric stroke. Seventy-six clients had another brain injury prior to their admission

1  
2  
3 injury (7.5%). Individuals with a stroke diagnosis represented 54.0% of those clients (41 of  
4  
5 76). The presence of these individuals with prior injuries is consistent with evidence that  
6  
7 recurrent TBI is associated with increased disability<sup>31</sup>, and prior stroke is a significant risk  
8  
9 factor of recurrent stroke<sup>32</sup>.

12 The median length of acute hospital stay for the cohort was 5.0 months (IQR 2.8mo-  
13  
14 8.0mo), with TBI clients having significantly longer acute stays (largest corrected  $p < 0.001$ ).  
15  
16 Although it is not clear why this was the case, evidence suggests that accompanying injuries  
17  
18 and complications are associated with longer hospital stays for patients with TBI<sup>33</sup>.  
19  
20 Fortunately, rehabilitation appears to be effective in improving independence despite longer  
21  
22 periods between injury and rehabilitation admission<sup>34</sup>.

26 External causes of injury – defined as environmental events, circumstances or  
27  
28 conditions that are external to the body – are shown in Table 5. Internal causes (e.g. medical  
29  
30 conditions) are not included. Half of the cohort sustained their ABI due to an external cause  
31  
32 (50.6%, 512 of 1,011). Accidents were the leading external cause of injury (60.2%; 308 of  
33  
34 512), with motor vehicle accidents (MVA; 33.6%) the most common accident type. Clients  
35  
36 aged below 30 were most likely to have sustained an ABI due to motor vehicle accidents (77  
37  
38 of 172, 44.8%), with a median age of 23.7 years (IQR 19.1y-37.7y), whereas clients aged  
39  
40 from 40-60 were most likely to have been injured in accidental falls (35 of 61, 57.4%),  
41  
42 corrected  $p < 0.001$ . Abnormal reaction during surgical or medical procedure was the leading  
43  
44 external cause of stroke (82.4%), while poisoning and toxic effect of substances was the  
45  
46 leading external cause of other NTBI (48.6%).

### 51 52 **Admission Characteristics**

53  
54  
55  
56  
57  
58  
59  
60

The majority of TBI (65.4%), stroke (63.7%) and other NTBI (54.8%) clients were admitted for post-acute transitional rehabilitation. The majority of neurologic clients were admitted to Supported Independent Living (43.7%).

Median time from injury to admission to community-based services was 10.5 months (IQR 5.7mo-27.1mo). Clients with neurologic conditions took significantly longer to access services than other ABI groups (largest corrected  $p < 0.001$ ). Those in the stroke group accessed services significantly faster than the TBI group ( $p < 0.001$ ) but did not differ from the other NTBI group ( $p = 0.40$ ).

Similar numbers of clients were admitted from hospital and home. There were significant differences in ABI group and admission source ( $p = 0.001$ ), with 71.1% of individuals with neurologic conditions admitted from home, 52.9% of the TBI group, 45.3% of the stroke group, and 39.8% of the other NTBI group. The overrepresentation of individuals with neurological injury in admissions from home is likely the result of slow onset of neurological injuries relative to acute injuries like stroke or TBI.

### Future Directions

The main focus of the ABI-REStART research program is to measure the short- and long-term outcomes of cohort members following discharge from post-acute services. The heterogeneity of the cohort, and the scope and quantity of longitudinal health data available provides a unique opportunity to identify the predictors of outcomes. Findings will enable greater understanding of personal and structural factors influencing outcomes, providing valuable evidence for clinicians to generate effective, personalized post-acute programs.

Health comorbidities of the cohort will also be examined to understand the complex needs of people with ABI and facilitate effective person-centred care. Comorbidities—i.e. chronic condition(s) co-existing with an index disease<sup>35</sup>—are common following ABI.



1  
2  
3  
4  
5  
6  
7  
8  
9  
10  
11  
12  
13  
14  
15  
16  
17  
18  
19  
20  
21  
22  
23  
24  
25  
26  
27  
28  
29  
30  
31  
32  
33  
34  
35  
36  
37  
38  
39  
40  
41  
42  
43  
44  
45  
46  
47  
48  
49  
50  
51  
52  
53  
54  
55  
56  
57  
58  
59  
60

Complex or mismanaged comorbidity can affect the course and outcome of rehabilitation and result in poorer functional outcomes, longer stay, and higher use and costs of healthcare services<sup>36-38</sup>. Better understanding of comorbidities can support a focus on the whole person, not only neurologic recovery, which is critical for effective community re-integration.

Mental health disorders are common for those with ABI<sup>27,38</sup>. Individuals with mental health comorbidities present before or after ABI have poorer outcomes than those without<sup>38,39</sup>. Research using 263 ABI-REStART members found that mental health comorbidities were present in 55.8% of the sample ( $n=106$ ), representing the most common comorbidity<sup>26</sup>. The ABI-REStART study provides the opportunity to examine the prevalence of mental illness, specific mental health needs, and its impact on rehabilitation outcomes to inform policy and services for mental health and ABI.

### **Strengths and Limitations**

ABI-REStART is the largest post-acute community-based ABI cohort study in Australia. The unique design provides novel opportunities to examine the longitudinal needs of people living with ABI, and to evaluate the efficacy of post-acute rehabilitation and support programs offered. The cohort was formed over 29 years, allowing the effects of policy and treatment changes over time to be examined. The use of both internal clinical data and linked health data produces a detailed picture of brain injury that is more complex than could be derived from a single source, allowing complex questions around the nature of ABI and the individualized client requirements to be examined.

As ABI-REStART is comprised of individuals from a single organization, this population differs from the ABI population in Western Australia in some ways. The cohort is relatively young, with only 6.2% of clients aged 65 years or above. This underrepresentation reduces the conclusions that can be drawn from this cohort around older adults. Similarly,

only 3.4% of the study cohort were of Aboriginal or Torres Strait Islander background despite Indigenous Australians being overrepresented in TBI cases in Western Australia<sup>2,40</sup> and having elevated stroke risk relative to non-Indigenous Australians<sup>41,42</sup>. Research is needed to examine the factors impacting the engagement of Indigenous Australians with post-acute services. Finally, the use of a State-based data linkage register is limited, as pre-admission or post-discharge follow-up data for cohort members based interstate or overseas will not be captured in the WA Data Linkage System data collections.

### **Collaboration**

Researchers interested in collaborating on cohort analyses should contact the corresponding author to express their interest. Initial planned data analyses and publications will be conducted by the primary ABI-REStART study investigators; however the research team is open to potential collaboration on future analyses. Access to the data is only possible with express permission of the University of Western Australia and West Australian Department of Health Human Research Ethics Committees and data custodians, and may require a data sharing agreement. Analysis of linked data is currently authorised to occur at only one location in Perth, Western Australia, owing to ethical considerations.

### **Funding declaration**

This research received no specific grant from any funding agency in the public, commercial or not-for-profit sectors.

### **Competing interests**

None declared.

### **Acknowledgements**

The authors gratefully acknowledge all the clients and families at Brightwater Care Group who participated in this study and all the staff who contributed to the data collection.

### **Author Contribution**

**GM** performed the data collection, wrote the statistical analysis plan, analysed the data and drafted and revised the paper. **LT** designed and supervised the study, provided analytical input, and drafted and revised the paper. **JW** provided clinical and service input, and revised the draft paper. **AM** designed and led the study, obtained linked data, obtained funding for the study and revised the draft paper.

### **Data sharing statement**

Data may be made available upon reasonable request. Access to the data is only possible with express permission of the WA Department of Health Human Research Ethics Committees and data custodians, and may require a data sharing agreement. Analysis of linked data is currently authorised to occur at only one location in Perth, Western Australia, owing to ethical considerations.

## References

1. Rushworth N. *Brain Injury Australia: Submission to the Australian Government's National Mental Health and Disability Employment Strategy.*; 2008.  
<https://www.braininjuryaustralia.org.au/wp-content/uploads//BRAININJURYAUSTRALIAsubmissionEMPLOYMENTSTRATEGYfinal.pdf>
2. Fortune N, Wen X. *The Definition, Incidence and Prevalence of Acquired Brain Injury in Australia.* Australian Institute of Health and Welfare; 1999.
3. Brain Injury Australia. About brain injury. Published 2016.  
<https://www.braininjuryaustralia.org.au/>
4. Fleminger S, Ponsford J. Long term outcome after traumatic brain injury. *Br Med J.* 2005;331(7530):1419-1420. doi:10.1136/bmj.331.7530.1419
5. van Velzen JM, van Bennekom CAM, Edelaar MJA, Sluiter JK, Frings-Dresen MHW. How many people return to work after acquired brain injury?: A systematic review. *Brain Inj.* 2009;23(6):473-488. doi:10.1080/02699050902970737
6. McCabe P, Lippert C, Weiser M, Hilditch M, Hartridge C, Villamere J. Community reintegration following acquired brain injury. *Brain Inj.* 2007;21(2):231-257.  
doi:10.1080/02699050701201631
7. Wise EK, Mathews-Dalton C, Dikmen S, et al. Impact of traumatic brain injury on participation in leisure activities. *Arch Phys Med Rehabil.* 2010;91(9):1357-1362.  
doi:10.1016/j.apmr.2010.06.009
8. Ownsworth T, Fleming J, Haines T, et al. Development of depressive symptoms during early community reintegration after traumatic brain injury. *J Int Neuropsychol*

- 1  
2  
3           *Soc.* 2011;17(1):112-119. doi:10.1017/S1355617710001311  
4  
5  
6 9. Turner BJ, Fleming JM, Ownsworth TL, Cornwell PL. The transition from hospital to  
7  
8 home for individuals with acquired brain injury: A literature review and research  
9  
10 recommendations. *Disabil Rehabil.* 2008;30(16):1153-1176.  
11  
12 doi:10.1080/09638280701532854  
13  
14  
15 10. Curran C, Dorstyn D, Polychronis C, Denson L. Functional outcomes of community-  
16  
17 based brain injury rehabilitation clients. *Brain Inj.* 2015;29(1):25-32.  
18  
19 doi:10.3109/02699052.2014.948067  
20  
21  
22 11. Borg DN, Nielsen M, Kennedy A, et al. The effect of access to a designated  
23  
24 interdisciplinary post-acute rehabilitation service on participant outcomes after brain  
25  
26 injury. *Brain Inj.* 2020;34(10):1358-1366. doi:10.1080/02699052.2020.1802660  
27  
28  
29 12. Christie L, Egan C, Wyborn J, Simpson GK. Evaluating client experience of  
30  
31 rehabilitation following acquired brain injury: a cross-sectional study. *Brain Inj.*  
32  
33 2021;35(2):215-225. doi:10.1080/02699052.2020.1867768  
34  
35  
36 13. Williams E, Jackson H, Wagland J, Martini A. Community Rehabilitation Outcomes  
37  
38 for Different Stroke Diagnoses: An Observational Cohort Study. *Arch Rehabil Res*  
39  
40 *Clin Transl.* 2020;2(2):100047. doi:10.1016/j.arrct.2020.100047  
41  
42  
43 14. Brightwater Care Group. Brain injury rehabilitation. Published 2020.  
44  
45 <https://brightwatergroup.com/disability/brain-injury-rehabilitation/>  
46  
47  
48 15. Department of Health Government of Western Australia. Data Linkage Western  
49  
50 Australia. Published 2020. <https://www.datalinkage-wa.org.au/>  
51  
52 16. Australian Rehabilitation Outcomes Centre. *AROC Impairment Coding Guidelines.*;  
53  
54 2013.  
55  
56 [https://documents.uow.edu.au/content/groups/public/@web/@chsd/@aroc/documents/](https://documents.uow.edu.au/content/groups/public/@web/@chsd/@aroc/documents/doc/uow125260.pdf)  
57  
58 [doc/uow125260.pdf](https://documents.uow.edu.au/content/groups/public/@web/@chsd/@aroc/documents/doc/uow125260.pdf)  
59  
60

17. Tsai Y-C, Liu C-J, Huang H-C, et al. A Meta-analysis of Dynamic Prevalence of Cognitive Deficits in the Acute, Subacute, and Chronic Phases After Traumatic Brain Injury. *J Neurosci Nurs*. 2021;53(2):63-68. doi:10.1097/JNN.0000000000000570
18. Echlin F. Traumatic Subdural Hematoma—Acute, Subacute and Chronic. *J Neurosurg*. 1949;6(4):294-303. doi:10.3171/jns.1949.6.4.0294
19. Cicerone KD, Mott T, Azulay J, et al. A Randomized Controlled Trial of Holistic Neuropsychologic Rehabilitation After Traumatic Brain Injury. *Arch Phys Med Rehabil*. 2008;89(12):2239-2249. doi:10.1016/j.apmr.2008.06.017
20. Piccenna L, Knox L, Douglas L. *Slow Stream Rehabilitation: An Overview.*; 2016. <https://www.summerfoundation.org.au/wp-content/uploads/ssr-briefing-paper-7-june-2016-final.pdf>
21. Jackson D, Seaman K, Sharp K, Singer R, Wagland J, Turner-Stokes L. Staged residential post-acute rehabilitation for adults following acquired brain injury: A comparison of functional gains rated on the UK Functional Assessment Measure (UK FIM+FAM) and the Mayo-Portland Adaptability Inventory (MPAI-4). *Brain Inj*. 2017;31(11):1405-1413. doi:10.1080/02699052.2017.1350998
22. Brightwater Care Group. Transitional support. Published 2020. <https://brightwatergroup.com/disability/transitional-support/>
23. National Disability Insurance Agency. What is the NDIS? Published 2020. <https://www.ndis.gov.au/understanding/what-ndis>
24. Brightwater Care Group. Supported Independent Living. <https://brightwatergroup.com/disability/supported-independent-living/>
25. StataCorp. Stata statistical software: Release 16. Published online 2019.
26. Jackson HM, Troeung L, Martini A. Prevalence, Patterns, and Predictors of Multimorbidity in Adults With Acquired Brain Injury at Admission to Staged

- 1  
2  
3 Community-Based Rehabilitation. *Arch Rehabil Res Clin Transl*. 2020;2(4):100089.  
4  
5 doi:10.1016/j.arrct.2020.100089  
6  
7  
8 27. Colantonio A, Gerber G, Bayley M, Deber R, Yin J, Kim H. Differential profiles for  
9  
10 patients with traumatic and nontraumatic brain injury. *J Rehabil Med*. 2011;43(4):311-  
11  
12 315. doi:10.2340/16501977-0783  
13  
14  
15 28. Simons LA, McCallum J, Friedlander Y, Simons J. Risk factors for ischemic stroke:  
16  
17 Dubbo study of the elderly. *Stroke*. 1998;29(7):1341-1346.  
18  
19 doi:10.1161/01.STR.29.7.1341  
20  
21  
22 29. Kelly-Hayes M. Influence of age and health behaviors on stroke risk: Lessons from  
23  
24 longitudinal studies. *J Am Geriatr Soc*. 2010;58(SUPPL. 2):325-328.  
25  
26 doi:10.1111/j.1532-5415.2010.02915.x  
27  
28  
29 30. Langhorne P, Ramachandra S. Organised inpatient (stroke unit) care for stroke:  
30  
31 network meta-analysis. *Cochrane Database Syst Rev*. Published online April 23, 2020.  
32  
33 doi:10.1002/14651858.CD000197.pub4  
34  
35  
36 31. Gavett BE, Stern RA, McKee AC. Chronic Traumatic Encephalopathy: A Potential  
37  
38 Late Effect of Sport-Related Concussive and Subconcussive Head Trauma. *Clin Sports*  
39  
40 *Med*. 2011;30(1):179-188. doi:10.1016/j.csm.2010.09.007  
41  
42  
43 32. Burn J, Dennis M, Bamford J, Sandercock P, Wade D, Warlow C. Long-term risk of  
44  
45 recurrent stroke after a first-ever stroke. The Oxfordshire Community Stroke Project.  
46  
47 *Stroke*. 1994;25(2):333-337. doi:10.1161/01.STR.25.2.333  
48  
49  
50 33. Tardif PA, Moore L, Boutin A, et al. Hospital length of stay following admission for  
51  
52 traumatic brain injury in a Canadian integrated trauma system: A retrospective  
53  
54 multicenter cohort study. *Injury*. 2017;48(1):94-100. doi:10.1016/j.injury.2016.10.042  
55  
56  
57 34. Williams E, Martini A, Jackson H, Wagland J, Turner-Stokes L. Time between  
58  
59 acquired brain injury and admission to community-based rehabilitation: differences in  
60

- 1  
2  
3 cognitive and functional gains. *Brain Inj.* 2020;34(6):713-722.  
4  
5 doi:10.1080/02699052.2020.1740943  
6  
7  
8 35. Royal Australian College of General Practitioners (RACGP). Part A: Multimorbidity.  
9  
10 In: *RACGP Aged Care Clinical Guide (Silver Book)*. 5th ed. Royal Australian College  
11  
12 of General Practitioners; 2019.  
13  
14  
15 36. Giaquinto S. Comorbidity in post-stroke rehabilitation. *Eur J Neurol.* 2003;10(3):235-  
16  
17 238. doi:10.1046/j.1468-1331.2003.00563.x  
18  
19  
20 37. Stineman MG, Ross RN, Williams S V., Goin JE, Granger C V. A functional  
21  
22 diagnostic complexity index for rehabilitation medicine: Measuring the influence of  
23  
24 many diagnoses on functional independence and resource use. *Arch Phys Med Rehabil.*  
25  
26 2000;81(5):549-557. doi:10.1053/mr.2000.5977  
27  
28  
29 38. Hart T, Brenner L, Clark AN, et al. Major and minor depression after traumatic brain  
30  
31 injury. *Arch Phys Med Rehabil.* 2011;92(8):1211-1219.  
32  
33 doi:10.1016/j.apmr.2011.03.005  
34  
35  
36 39. Williams LS, Ghose SS, Swindle RW. Depression and other mental health diagnoses  
37  
38 increase mortality risk after ischemic stroke. *Am J Psychiatry.* 2004;161(6):1090-1095.  
39  
40 doi:10.1176/appi.ajp.161.6.1090  
41  
42  
43 40. Katzenellenbogen JM, Atkins E, Thompson SC, et al. Missing voices: Profile, extent,  
44  
45 and 12-month outcomes of nonfatal traumatic brain injury in Aboriginal and non-  
46  
47 Aboriginal adults in Western Australia using linked administrative records. *J Head*  
48  
49 *Trauma Rehabil.* 2018;33(6):412-423. doi:10.1097/HTR.0000000000000371  
50  
51  
52 41. Kilkenney MF, Harris DM, Ritchie EA, Price C, Cadilhac DA. Hospital management  
53  
54 and outcomes of stroke in Indigenous Australians: Evidence from the 2009 Acute Care  
55  
56 National Stroke Audit. *Int J Stroke.* 2013;8(3):164-171. doi:10.1111/j.1747-  
57  
58 4949.2011.00717.x  
59  
60



- 1  
2  
3  
4  
5  
6  
7  
8  
9  
10  
11  
12  
13  
14  
15  
16  
17  
18  
19  
20  
21  
22  
23  
24  
25  
26  
27  
28  
29  
30  
31  
32  
33  
34  
35  
36  
37  
38  
39  
40  
41  
42  
43  
44  
45  
46  
47  
48  
49  
50  
51  
52  
53  
54  
55  
56  
57  
58  
59  
60
42. Katzenellenbogen JM, Vos T, Somerford P, Begg S, Semmens JB, Codde JP. Burden of stroke in Indigenous Western Australians: A study using data linkage. *Stroke*. 2011;42(6):1515-1521. doi:10.1161/STROKEAHA.110.601799
  43. Australian Bureau of Statistics. Socio-Economic Indexes for Areas. Published 2018. <https://www.abs.gov.au/websitedbs/censushome.nsf/home/seifa>
  44. Australian Bureau of Statistics. The Australian statistical geography standard (ASGS) remoteness structure. Published 2018. <https://www.abs.gov.au/websitedbs/D3310114.nsf/home/remoteness+structure>
  45. Teasdale G, Jennett B. Assessment of coma and impaired consciousness. *Lancet*. 1974;304(7872):81-84. doi:10.1016/S0140-6736(74)91639-0
  46. Turner-Stokes L, Nyein K, Turner-Stokes T, Gatehouse C. The UK FIM+FAM: development and evaluation. *Clin Rehabil*. 1999;13(4):277-287. doi:10.1191/026921599676896799
  47. Malec J, Lezak M. MPAI-4 Manual. 2003;(April 2003):1-84.
  48. Kiresuk TJ, Sherman RE. Goal attainment scaling: A general method for evaluating comprehensive community mental health programs. *Community Ment Health J*. 1968;4(6):443-453. doi:10.1007/BF01530764
  49. Von Steinbuechel N, Petersen C, Bullinger M, the QOLIBRI Group. Assessment of health-related quality of life in persons after traumatic brain injury - Development of the Qolibri, a specific measure. *Acta Neurochir Suppl*. 2005;(93):43-49. doi:10.1007/3-211-27577-0\_6
  50. von Steinbüchel N, Wilson L, Gibbons H, et al. Quality of Life after Brain Injury (QOLIBRI): Scale Validity and Correlates of Quality of Life. *J Neurotrauma*. 2010;27(7):1157-1165. doi:10.1089/neu.2009.1077
  51. Turner-Stokes L, Shaw A, Law J, Rose H. Development and initial validation of the

1  
2  
3 Northwick Park Therapy Dependency Assessment. *Clin Rehabil.* 2009;23(10):922-  
4  
5 937. doi:10.1177/0269215509337447  
6

- 7  
8 52. Zigmond AS, Snaith RP. The Hospital Anxiety and Depression Scale. *Acta Psychiatr*  
9  
10 *Scand.* 1983;67(6):361-370. doi:10.1111/j.1600-0447.1983.tb09716.x  
11  
12  
13  
14  
15  
16  
17  
18  
19  
20  
21  
22  
23  
24  
25  
26  
27  
28  
29  
30  
31  
32  
33  
34  
35  
36  
37  
38  
39  
40  
41  
42  
43  
44  
45  
46  
47  
48  
49  
50  
51  
52  
53  
54  
55  
56  
57  
58  
59  
60

**Table 1. Data sources, key measures and variables available for the ABI-REStART study**

|                 | Date        | Data Source/Type            | Description                                                                                                                                                                                                                                                               | Key Variables                                                                                                                                                                                                                                                                                                    |
|-----------------|-------------|-----------------------------|---------------------------------------------------------------------------------------------------------------------------------------------------------------------------------------------------------------------------------------------------------------------------|------------------------------------------------------------------------------------------------------------------------------------------------------------------------------------------------------------------------------------------------------------------------------------------------------------------|
|                 | 1991 - 2020 | Admissions                  | <ul style="list-style-type: none"> <li>Admission &amp; discharge date</li> <li>Facility</li> <li>Programs</li> <li>Referral source</li> </ul>                                                                                                                             | <ul style="list-style-type: none"> <li>Time since injury to admission</li> <li>Admission source</li> <li>Admission program</li> <li>Admission and discharge dates</li> <li>Age at admission</li> </ul>                                                                                                           |
|                 | 1991 - 2020 | Demographics                | <ul style="list-style-type: none"> <li>Demographics</li> <li>Social background</li> </ul>                                                                                                                                                                                 | <ul style="list-style-type: none"> <li>Age at injury</li> <li>Gender</li> <li>Indigenous status</li> <li>Country of birth</li> <li>Usual occupation</li> <li>SEIFA IRSD<sup>43</sup></li> <li>ASGS Remoteness Area<sup>44</sup></li> </ul>                                                                       |
|                 | 1991 - 2020 | Clinical                    | <ul style="list-style-type: none"> <li>Diagnoses</li> <li>Vital signs / observations</li> <li>Medications</li> <li>Investigations (pathology, radiology)</li> <li>Medical &amp; allied health consultation notes</li> <li>Medical correspondence and referrals</li> </ul> | <ul style="list-style-type: none"> <li>ABI type (TBI, NTBI, neurologic)</li> <li>Injury location (unilateral, bilateral)</li> <li>Cause of injury</li> <li>Severity (Glasgow Coma Scale<sup>45</sup>, post-traumatic amnesia, loss of consciousness)</li> <li>Injury phase (acute, subacute, chronic)</li> </ul> |
|                 | 1991 - 2020 | Rehabilitation              | <ul style="list-style-type: none"> <li>Australasian Rehabilitation Outcomes Centre (AROC) Impairment Code</li> <li>Outcome measures</li> </ul>                                                                                                                            | <ul style="list-style-type: none"> <li>FIM+FAM<sup>46</sup></li> <li>MPAI-4<sup>47</sup></li> <li>GAS<sup>48</sup></li> </ul>                                                                                                                                                                                    |
|                 | 1991 - 2020 | Psychosocial                | <ul style="list-style-type: none"> <li>Mental health</li> <li>Quality of life</li> <li>Behavioural</li> <li>Well-being</li> </ul>                                                                                                                                         | <ul style="list-style-type: none"> <li>QOLIBRI<sup>49,50</sup></li> <li>NPTDA<sup>51</sup></li> <li>HADS<sup>52</sup></li> </ul>                                                                                                                                                                                 |
| <b>EXTERNAL</b> | 1981 - 2020 | Hospital (HMDC)             | <ul style="list-style-type: none"> <li>Hospital admissions and separations for all public and private hospitals in WA</li> </ul>                                                                                                                                          | <ul style="list-style-type: none"> <li>Comorbidities</li> <li>Comorbidity severity</li> <li>Surgical procedures</li> <li>Health service use patterns</li> </ul>                                                                                                                                                  |
|                 | 2002 - 2020 | Emergency department (EDDC) | <ul style="list-style-type: none"> <li>ED presentations at all public and private hospitals in WA</li> </ul>                                                                                                                                                              |                                                                                                                                                                                                                                                                                                                  |
|                 | 1981 - 2020 | Mental health (MHIS)        | <ul style="list-style-type: none"> <li>Inpatient and outpatient community mental health presentations</li> </ul>                                                                                                                                                          |                                                                                                                                                                                                                                                                                                                  |
|                 | 1991 - 2020 | Deaths                      | <ul style="list-style-type: none"> <li>All deaths occurring in WA</li> </ul>                                                                                                                                                                                              | <ul style="list-style-type: none"> <li>Cause of death</li> <li>Time to death</li> </ul>                                                                                                                                                                                                                          |

Note: SEIFA IRSD = Socio-Economic Indexes for Areas Index of Relative Socioeconomic Disadvantage; ASGS = Australian Statistical Geography Standard; FIM+FAM = Functional Independence Measure + Functional Assessment Measure; MPAI-4 = Mayo-Portland Adaptability Inventory; GAS = Goal Attainment Scale; QOLIBRI = Quality of Life After Brain Injury; NPTDA = Northwick Park Therapy Dependency Assessment; HADS = Hospital Anxiety and Depression Scale.

**Table 2. Sociodemographic characteristics for the ABI-REStART cohort at admission to post-acute community-based brain injury support programs, 1991-2020 (n=1,011)**

| Characteristics                                   | Total, n=1,011  | 1991-2002, n=231 | 2003-2007, n=145 | 2008-2013, n=220 | 2014-2020, n=415 |
|---------------------------------------------------|-----------------|------------------|------------------|------------------|------------------|
| <b>Sex, n (%)</b>                                 |                 |                  |                  |                  |                  |
| Male                                              | 682 (67.5)      | 150 (64.9)       | 108 (74.5)       | 156 (70.9)       | 268 (64.6)       |
| Female                                            | 329 (32.5)      | 81 (35.1)        | 37 (25.5)        | 64 (29.1)        | 147 (35.4)       |
| <b>Age at admission, mean <math>\pm</math> SD</b> |                 |                  |                  |                  |                  |
| Total                                             | 45.4 $\pm$ 15.5 | 44.1 $\pm$ 21.5  | 39.5 $\pm$ 12.5  | 44.2 $\pm$ 12.8  | 48.8 $\pm$ 12.9  |
| Male                                              | 44.2 $\pm$ 14.6 | 39.8 $\pm$ 18.0  | 39.9 $\pm$ 12.8  | 44.7 $\pm$ 12.3  | 48.0 $\pm$ 13.3  |
| Female                                            | 47.9 $\pm$ 17.1 | 51.9 $\pm$ 25.0  | 38.3 $\pm$ 11.6  | 43.0 $\pm$ 13.9  | 50.2 $\pm$ 12.1  |
| <b>Age category at admission, n (%)</b>           |                 |                  |                  |                  |                  |
| <18 years                                         | 15 (1.5)        | 8 (3.5)          | 3 (2.1)          | -                | 4 (1.0)          |
| 18-29                                             | 190 (18.8)      | 66 (28.6)        | 36 (24.8)        | 40 (18.2)        | 48 (11.6)        |
| 30-39                                             | 161 (15.9)      | 46 (19.9)        | 32 (22.1)        | 34 (15.5)        | 49 (11.8)        |
| 40-49                                             | 223 (22.1)      | 43 (18.6)        | 43 (29.7)        | 54 (24.6)        | 83 (20.0)        |
| 50-59                                             | 274 (27.1)      | 19 (8.2)         | 26 (17.9)        | 78 (35.5)        | 151 (36.4)       |
| 60-69                                             | 102 (10.1)      | 7 (3.0)          | 5 (3.5)          | 14 (6.4)         | 76 (18.3)        |
| $\geq$ 70 years                                   | 46 (4.6)        | 42 (18.2)        | -                | -                | 4 (1.0)          |
| <b>Indigenous, n (%)</b>                          |                 |                  |                  |                  |                  |
| Total                                             | 34 (3.4)        | 2 (0.9)          | -                | 13 (5.9)         | 19 (4.6)         |
| Male                                              | 24 (70.6)       | 1 (0.5)          | -                | 11 (84.6)        | 12 (63.2)        |
| Female                                            | 10 (29.4)       | 1 (0.5)          | -                | 2 (15.4)         | 7 (36.8)         |
| Mean age $\pm$ SD                                 | 38.8 $\pm$ 13.6 | 31.0 $\pm$ 0.8   | -                | 40.0 $\pm$ 15.2  | 38.8 $\pm$ 13.4  |
| <b>Marital Status, n (%)</b>                      |                 |                  |                  |                  |                  |
| Single                                            | 444 (43.9)      | 101 (43.7)       | 76 (52.4)        | 99 (45.0)        | 168 (40.5)       |
| De Facto                                          | 38 (3.8)        | 3 (1.3)          | 2 (1.4)          | 12 (5.5)         | 21 (5.1)         |
| Married                                           | 253 (25.0)      | 73 (31.6)        | 30 (20.7)        | 50 (22.7)        | 100 (24.1)       |
| Separated                                         | 59 (5.8)        | 13 (5.6)         | 10 (6.9)         | 12 (5.5)         | 24 (5.8)         |
| Divorced                                          | 133 (13.2)      | 14 (6.1)         | 20 (13.8)        | 35 (15.9)        | 64 (15.4)        |
| Widowed                                           | 30 (3.0)        | 16 (6.9)         | 1 (0.7)          | 3 (1.4)          | 10 (2.4)         |
| Unknown                                           | 54 (5.3)        | 11 (4.8)         | 6 (4.1)          | 9 (4.1)          | 28 (6.8)         |
| <b>Country of Birth, n (%)</b>                    |                 |                  |                  |                  |                  |
| Australia (and external territories)              | 654 (64.7)      | 162 (70.1)       | 98 (67.6)        | 120 (54.6)       | 274 (66.0)       |
| New Zealand                                       | 31 (3.1)        | 9 (3.9)          | 5 (3.5)          | 5 (2.3)          | 12 (2.9)         |
| Maritime South-East Asia                          | 27 (2.7)        | 3 (1.3)          | 1 (0.7)          | 6 (2.7)          | 17 (4.1)         |
| Mainland South-East Asia                          | 13 (1.3)        | 3 (1.3)          | 2 (1.4)          | 2 (0.9)          | 6 (1.5)          |
| Southern Asia                                     | 11 (1.1)        | -                | -                | 3 (1.4)          | 8 (1.9)          |
| Chinese Asia                                      | 9 (0.9)         | 2 (0.9)          | -                | 2 (0.9)          | 5 (1.2)          |
| Southern and East Africa                          | 18 (1.8)        | -                | 2 (1.4)          | 3 (1.4)          | 13 (3.1)         |
| The United Kingdom                                | 84 (8.3)        | 28 (12.1)        | 12 (8.3)         | 14 (6.4)         | 30 (7.2)         |
| Western Europe                                    | 11 (1.1)        | 2 (0.9)          | 1 (0.7)          | 4 (1.8)          | 4 (1.0)          |

## Cohort Profile: ABI-REStART, 1991-2020

26

|                                                      |            |            |            |            |                |
|------------------------------------------------------|------------|------------|------------|------------|----------------|
| Southern Europe                                      | 11 (1.1)   | 2 (0.9)    | -          | 3 (1.4)    | 6 (1.5)        |
| Other                                                | 44 (4.4)   | 7 (3.0)    | 4 (2.8)    | 9 (4.1)    | 24 (5.8)       |
| Unknown                                              | 98 (9.7)   | 13 (5.6)   | 20 (13.8)  | 49 (22.3)  | 16 (3.9)       |
| Usual Occupation, n (%)                              |            |            |            |            |                |
| Managers                                             | 26 (2.6)   | 1 (0.4)    | 4 (2.8)    | 9 (4.1)    | 12 (3.0)       |
| Professionals                                        | 49 (4.9)   | 5 (2.2)    | 3 (2.1)    | 11 (5.0)   | 30 (7.2)       |
| Technicians and<br>Trades Workers                    | 80 (7.9)   | 3 (1.3)    | 9 (6.2)    | 24 (10.9)  | 44 (10.6)      |
| Community and<br>Personal Service<br>Workers         | 34 (3.4)   | 2 (0.9)    | 6 (4.1)    | 8 (3.6)    | 18 (4.3)       |
| Clerical or<br>Administrative<br>Workers             | 20 (2.0)   | 1 (0.4)    | 2 (1.4)    | 5 (2.3)    | 12 (2.9)       |
| Sales Workers                                        | 10 (1.0)   | -          | 1 (0.7)    | -          | 9 (2.2)        |
| Machinery Operators<br>and Drivers                   | 31 (3.1)   | 4 (1.7)    | 2 (1.4)    | 10 (4.6)   | 15 (3.6)       |
| Labourers                                            | 48 (4.8)   | 5 (2.2)    | 6 (4.1)    | 12 (5.5)   | 25 (6.0)       |
| Not in workforce                                     | 206 (20.4) | 7 (3.0)    | 15 (10.3)  | 42 (19.1)  | 142<br>(34.22) |
| Unknown                                              | 507 (50.2) | 203 (87.9) | 97 (66.9)  | 99 (45.0)  | 108 (26.0)     |
| Accommodation Type, n (%)                            |            |            |            |            |                |
| Private Residence                                    | 318 (31.5) | 7 (3.0)    | 31 (21.4)  | 74 (33.6)  | 206 (49.6)     |
| Public Rental                                        | 56 (5.5)   | 4 (1.7)    | 1 (0.7)    | 20 (9.1)   | 31 (7.5)       |
| Family Home                                          | 40 (4.0)   | 3 (1.3)    | 11 (7.6)   | 1 (0.5)    | 11 (2.7)       |
| Supported<br>Accommodation                           | 19 (1.9)   | -          | -          | 1 (0.5)    | 18 (4.3)       |
| Residential Aged Care                                | 9 (0.7)    | -          | -          | 1 (0.5)    | 6 (1.5)        |
| Temporary Housing                                    | 15 (1.5)   | -          | -          | 1 (0.5)    | 14 (3.4)       |
| Crisis<br>Accommodation                              | 5 (0.5)    | -          | -          | 1 (0.5)    | 4 (1.0)        |
| Hospital                                             | 3 (0.3)    | -          | -          | -          | 3 (0.7)        |
| Institutional care                                   | 2 (0.2)    | -          | -          | -          | 2 (0.5)        |
| No fixed address                                     | 20 (2.0)   | -          | 3 (2.1)    | 6 (2.7)    | 11 (2.7)       |
| Unknown                                              | 526 (52.0) | 217 (94.9) | 99 (68.3)  | 101 (45.9) | 109 (26.3)     |
| ASGS – Remoteness Area, n (%)                        |            |            |            |            |                |
| Major city                                           | 814 (84.3) | 179 (77.5) | 113 (77.9) | 167 (75.9) | 355 (85.5)     |
| Inner regional                                       | 57 (5.9)   | 12 (5.2)   | 10 (6.9)   | 19 (8.6)   | 16 (3.9)       |
| Outer regional                                       | 45 (4.7)   | 16 (6.9)   | 13 (9.0)   | 9 (4.1)    | 7 (1.7)        |
| Remote                                               | 28 (2.9)   | 6 (2.6)    | 1 (0.7)    | 11 (5.0)   | 10 (2.4)       |
| Very Remote                                          | 14 (1.5)   | 7 (3.0)    | 1 (0.7)    | 1 (0.5)    | 5 (1.2)        |
| Migratory & Offshore                                 | 8 (0.8)    | 6 (2.6)    | 2 (1.4)    | 0          | 0              |
| Missing                                              | 45 (4.5)   | 5 (2.2)    | 5 (3.5)    | 13 (5.9)   | 22 (5.3)       |
| SEIFA – Index of Relative Social Disadvantage, n (%) |            |            |            |            |                |
| Q1 – Most<br>disadvantaged                           | 141 (14.0) | 61 (26.4)  | 37 (25.5)  | 18 (8.2)   | 25 (6.0)       |
| Q2 – More<br>disadvantaged                           | 83 (8.2)   | 6 (2.6)    | 10 (6.9)   | 25 (11.4)  | 42 (10.1)      |
| Q3 – Average                                         | 216 (21.4) | 22 (9.5)   | 19 (13.1)  | 68 (30.9)  | 107 (25.8)     |

## Cohort Profile: ABI-REStART, 1991-2020

27

|                          |            |           |           |           |            |
|--------------------------|------------|-----------|-----------|-----------|------------|
| Q4 – Less disadvantaged  | 291 (28.8) | 68 (29.4) | 41 (28.3) | 53 (24.1) | 129 (31.1) |
| Q5 – Least disadvantaged | 224 (22.2) | 63 (27.3) | 28 (19.3) | 43 (19.6) | 90 (21.7)  |
| Missing                  | 56 (5.5)   | 11 (4.8)  | 10 (6.9)  | 13 (5.9)  | 22 (5.3)   |

For peer review only

**Table 3. Brain injury diagnoses and Australasian Rehabilitation Outcomes Centre (AROC) Impairment Codes for the ABI-REStART cohort, 1991-2020**

| AROC Code, Category and Diagnosis                    | n (%)      |
|------------------------------------------------------|------------|
| <b>Non-traumatic (Stroke)</b>                        | 292 (28.9) |
| 1.1 Stroke – Haemorrhagic                            | 81 (8.0)   |
| 1.2 Stroke – Ischemic                                | 178 (17.6) |
| 1.0 Stroke – Unspecified                             | 33 (3.3)   |
| <b>Non-traumatic (other - excluding stroke)</b>      | 263 (26.0) |
| 2.11 Subarachnoid haemorrhage                        | 58 (5.7)   |
| 2.12 Anoxic brain damage                             | 78 (7.7)   |
| 2.13 Encephalitis                                    | 18 (1.8)   |
| Meningitis                                           | 6 (0.6)    |
| Neoplasm/tumour of brain, meninges or cranial nerves | 32 (3.2)   |
| Intracranial abscess                                 | 2 (0.2)    |
| Hydrocephalus                                        | 5 (0.5)    |
| Toxic encephalopathy                                 | 35 (3.5)   |
| Metabolic encephalopathy                             | 7 (0.7)    |
| Other non-traumatic brain dysfunction                | 22 (2.2)   |
| <b>Traumatic</b>                                     | 353 (34.9) |
| 2.21 Traumatic, open injury                          | 50 (5.0)   |
| 2.22 Traumatic, closed injury                        | 280 (27.7) |
| 2.2 Traumatic, unspecified                           | 23 (2.3)   |
| <b>Neurologic</b>                                    | 103 (10.2) |
| 3.1 Multiple sclerosis                               | 16 (1.6)   |
| 3.2 Parkinsonism                                     | 17 (1.7)   |
| 3.3 Polyneuropathy                                   | 3 (0.3)    |
| 3.4 Guillain-Barré Syndrome                          | 1 (0.1)    |
| 3.8 Neuromuscular Disorders                          | 13 (1.3)   |
| 3.9 Extrapyramidal and abnormal movement disorders   | 2 (0.2)    |
| Spinocerebellar disease                              | 3 (0.3)    |
| Epilepsy                                             | 31 (3.1)   |
| Other neurologic and neurodegenerative disorders     | 17 (1.7)   |

**Table 4. Brain injury and admission characteristics for the ABI-REStART cohort at admission to community-based brain injury services, 1991-2020 (n=1,011)**

| Characteristics                                   | Total,<br>n = 1,011   | Traumatic,<br>n=353    | Non-traumatic         |                       | Neurologic,<br>N=103 |
|---------------------------------------------------|-----------------------|------------------------|-----------------------|-----------------------|----------------------|
|                                                   |                       |                        | Stroke,<br>n=292      | Other NTBI,<br>n=263  |                      |
| <b><i>Sociodemographic</i></b>                    |                       |                        |                       |                       |                      |
| Age at injury, mean ± SD (years)                  | 42.3 ± 16.5,<br>n=853 | 33.4 ± 14.9,<br>n= 303 | 51.0 ± 13.4,<br>n=265 | 43.0 ± 15.0,<br>n=226 | 46.8 ± 18.9,<br>n=59 |
| Gender, n (%)                                     |                       |                        |                       |                       |                      |
| Male                                              | 682 (67.5)            | 283 (80.2)             | 197 (67.5)            | 142 (54.0)            | 60 (58.3)            |
| Female                                            | 329 (32.5)            | 70 (19.8)              | 95 (32.5)             | 121 (46.0)            | 43 (41.8)            |
| Indigenous, n (%)                                 |                       |                        |                       |                       |                      |
| Total                                             | 34 (3.4)              | 16 (4.5)               | 10 (3.4)              | 5 (1.9)               | 3 (2.9)              |
| Male                                              | 24 (3.5)              | 13 (4.6)               | 8 (4.1)               | 2 (1.4)               | 1 (1.7)              |
| Female                                            | 10 (3.0)              | 3 (4.3)                | 2 (2.1)               | 3 (2.5)               | 2 (4.7)              |
| <b><i>Clinical</i></b>                            |                       |                        |                       |                       |                      |
| Injury location, n (%)                            |                       |                        |                       |                       |                      |
| Right                                             | 114 (11.3)            | 24 (6.8)               | 76 (26.0)             | 13 (4.9)              | 1 (1.0)              |
| Left                                              | 145 (14.3)            | 38 (10.8)              | 97 (33.2)             | 10 (3.8)              | -                    |
| Unilateral – side unspecified                     | 101 (10.0)            | 42 (11.9)              | 40 (13.7)             | 19 (7.2)              | -                    |
| Bilateral                                         | 595 (58.9)            | 220 (62.3)             | 64 (21.9)             | 211 (80.2)            | 100 (97.1)           |
| Unknown                                           | 56 (5.5)              | 29 (8.2)               | 15 (5.1)              | 10 (3.8)              | 2 (1.9)              |
| Length of acute hospital stay, mean ± SD (months) | 6.0 ± 4.8,<br>n=740   | 7.0 ± 5.3,<br>n=273    | 5.1 ± 3.5,<br>n=236   | 5.9 ± 4.9,<br>n= 206  | 4.8 ± 6.7,<br>n= 25  |
| Previous ABI, n (%)                               | 76 (7.5)              | 15 (4.3)               | 41 (14.0)             | 19 (7.2)              | 1 (1.0)              |
| Injury phase, n (%)                               |                       |                        |                       |                       |                      |
| Acute (>3 months)                                 | 56 (6.0)              | 12 (3.5)               | 21 (7.5)              | 20 (8.3)              | 3 (4.1)              |
| Subacute (3 – 12 months)                          | 410 (43.7)            | 134 (39.2)             | 158 (56.2)            | 109 (45.0)            | 9 (12.3)             |
| Chronic (> 12 months)                             | 472 (50.3)            | 196 (57.3)             | 102 (36.3)            | 113 (46.7)            | 61 (83.6)            |
| <b><i>Admission</i></b>                           |                       |                        |                       |                       |                      |
| Age at admission, mean ± SD (years)               | 45.4 ± 15.5           | 37.8 ± 14.5            | 52.6 ± 13.2           | 45.4 ± 14.5           | 50.9 ± 15.8          |
| Time post-injury, n (%)                           |                       |                        |                       |                       |                      |
| < 1 year                                          | 466 (49.7)            | 146 (42.7)             | 179 (63.7)            | 129 (53.3)            | 12 (16.4)            |
| 1 – 2 years                                       | 161 (17.2)            | 68 (19.9)              | 48 (17.1)             | 40 (16.5)             | 5 (6.9)              |
| > 2 years                                         | 311 (31.1)            | 128 (37.4)             | 54 (19.2)             | 73 (30.2)             | 56 (76.7)            |
| Program, n (%)                                    |                       |                        |                       |                       |                      |
| TRP                                               | 546 (54.0)            | 232 (65.7)             | 168 (57.5)            | 140 (53.2)            | 17 (16.5)            |
| TAP                                               | 121 (12.0)            | 36 (10.2)              | 28 (9.6)              | 41 (15.6)             | 16 (15.5)            |
| CAPB                                              | 107 (10.6)            | 32 (9.1)               | 24 (8.2)              | 30 (11.4)             | 21 (20.4)            |
| HACC Social Support                               | 70 (6.9)              | 25 (7.1)               | 26 (8.9)              | 14 (5.3)              | 5 (4.9)              |
| SIL                                               | 167 (16.5)            | 39 (11.1)              | 46 (15.8)             | 38 (14.5)             | 44 (42.3)            |
| Admitted from, n (%)                              |                       |                        |                       |                       |                      |
| Home                                              | 435 (43.0)            | 165 (46.7)             | 120 (41.1)            | 96 (36.5)             | 54 (52.4)            |
| Hospital                                          | 437 (43.2)            | 139 (39.4)             | 140 (48.0)            | 136 (51.7)            | 22 (21.4)            |
| Other                                             | 22 (2.2)              | 8 (2.3)                | 5 (1.7)               | 9 (3.4)               | -                    |
| Unknown                                           | 117 (11.6)            | 41 (11.6)              | 27 (9.3)              | 22 (8.4)              | 27 (26.2)            |

Note. TRP = Transitional Rehabilitation Program; TAP = Transitional Accommodation Program; CAPB = Capacity Building; HACC = Home and Community Care; SIL = Supported Independent Living



**Table 5. Known external causes of brain injury for the ABI-REStART cohort (n=1,011)**

| Cause of ABI, n (%)                                                                    | Total,<br>n=1,011 | Traumatic,<br>n = 353 | Non-traumatic    |                      | Neurologic,<br>n=103 |
|----------------------------------------------------------------------------------------|-------------------|-----------------------|------------------|----------------------|----------------------|
|                                                                                        |                   |                       | Stroke,<br>n=292 | Other NTBI,<br>n=263 |                      |
| <i>Individuals with known external causes of injury</i>                                | 512               | 347                   | 51               | 111                  | 4                    |
| Accidents                                                                              |                   |                       |                  |                      |                      |
| Accidental fall                                                                        | 61 (11.9)         | 58 (16.7)             | 1 (2.0)          | 2 (1.8)              | -                    |
| Motor vehicle accident (incl. pedestrian)                                              | 172 (33.6)        | 167 (48.1)            | -                | 4 (3.6)              | 1 (33.3)             |
| Motorbike accident                                                                     | 29 (5.7)          | 29 (8.4)              | -                | -                    | -                    |
| Cycling accident                                                                       | 14 (2.7)          | 13 (3.8)              | -                | 1 (0.9)              | -                    |
| Quad bike accident                                                                     | 4 (0.8)           | 4 (1.2)               | -                | -                    | -                    |
| Railway accident                                                                       | 3 (0.6)           | 3 (0.9)               | -                | -                    | -                    |
| Drowning and submersion                                                                | 3 (0.6)           | 1 (0.3)               | -                | 2 (1.8)              | -                    |
| Other accident                                                                         | 12 (2.3)          | 9 (2.6)               | 1 (2.0)          | 2 (1.8)              | -                    |
| Unspecified accident                                                                   | 10 (1.9)          | 8 (2.3)               | -                | 2 (1.8)              | -                    |
| Poisoning and toxic effect of drugs, medicaments, or gases                             |                   |                       |                  |                      |                      |
| Accidental overdose                                                                    | 12 (2.3)          | -                     | 1 (2.0)          | 11 (9.9)             | -                    |
| Intentional overdose                                                                   | 19 (3.7)          | -                     | 1 (2.0)          | 18 (16.2)            | -                    |
| Unknown intent                                                                         | 9 (1.8)           | -                     | -                | 9 (8.1)              | -                    |
| Complication of chronic substance use                                                  | 20 (3.9)          | -                     | 3 (3.9)          | 16 (14.4)            | 1 (33.3)             |
| Intentional self-harm (excl. poisoning)                                                |                   |                       |                  |                      |                      |
| Hanging or strangulation                                                               | 4 (0.8)           | -                     | -                | 4 (3.6)              | -                    |
| Jumping from high place, or in front of moving object                                  | 7 (1.4)           | 7 (2.0)               | -                | -                    | -                    |
| Drowning                                                                               | 1 (0.2)           | -                     | -                | 1 (0.9)              | -                    |
| Unspecified suicide                                                                    | 2 (0.4)           | 1 (0.3)               | -                | 1 (0.9)              | -                    |
| Complications of medical and surgical care                                             |                   |                       |                  |                      |                      |
| Abnormal reaction during surgical or medical procedure                                 | 78 (15.2)         | 2 (0.6)               | 42 (82.4)        | 33 (29.7)            | 1 (33.3)             |
| Adverse effects of drugs, medicaments and biological substances during therapeutic use | 2 (0.4)           | -                     | 1 (2.0)          | 1 (0.9)              | -                    |
| Assault                                                                                | 50 (9.8)          | 45 (13.0)             | 1 (2.0)          | 4 (3.6)              | -                    |
| <i>Individuals with known internal or unknown causes</i>                               | 499               | 6                     | 241              | 152                  | 99                   |

Note. Percentages for each group were calculated using the number of individuals with known external causes of injury recorded as the denominator. Individuals with known internal or unknown causes were not included in the count.

Cohort Profile: ABI-REStART, 1991-2020

31

**Figure 1. Data Sources and Study Design for the ABI-REStART Study, 1991-2020. (a) Internal and External Data Sources and, (b) Study Design**

For peer review only

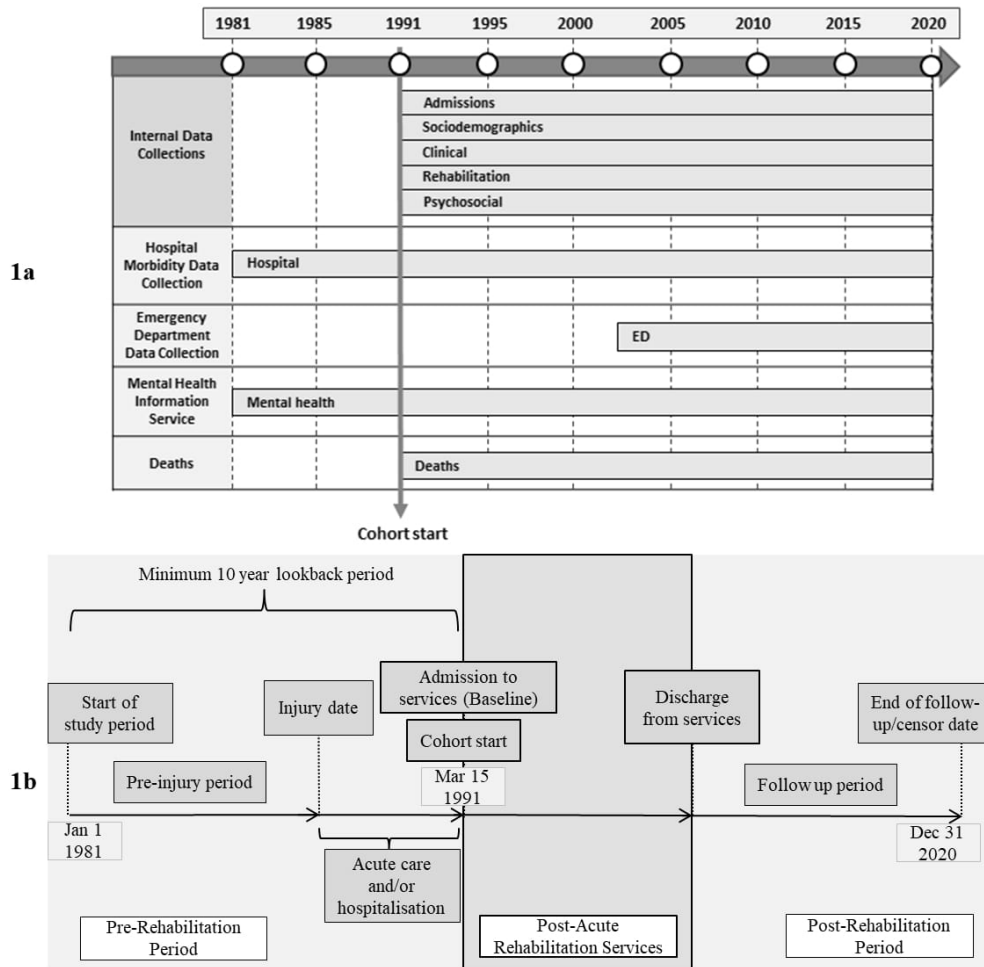

Figure 1. Data Sources and Study Design for the ABI-REStART Study, 1991-2020. (a) Internal and External Data Sources and, (b) Study Design

401x391mm (72 x 72 DPI)

**Table S 1. AROC codes and diagnoses eligible for admission to Brightwater services.**

| AROC Impairment Group                                      | AROC Impairment Group Code                                                              |
|------------------------------------------------------------|-----------------------------------------------------------------------------------------|
| Haemorrhagic Stroke                                        | 1.11 Left Body Involvement (Right Brain)                                                |
|                                                            | 1.12 Right Body Involvement (Left Brain)                                                |
|                                                            | 1.13 Bilateral Involvement                                                              |
|                                                            | 1.14 No Paresis                                                                         |
|                                                            | 1.19 Other Stroke                                                                       |
| Ischemic Stroke                                            | 1.21 Left Body Involvement (Right Brain)                                                |
|                                                            | 1.22 Right Body Involvement (Left Brain)                                                |
|                                                            | 1.23 Bilateral Involvement                                                              |
|                                                            | 1.24 No Paresis                                                                         |
|                                                            | 1.29 Other Stroke                                                                       |
| Brain Dysfunction                                          | 2.11 Non-traumatic Subarachnoid Haemorrhage                                             |
|                                                            | 2.12 Anoxic Brain Damage                                                                |
|                                                            | 2.13 Other Non-traumatic Brain Dysfunction                                              |
|                                                            | Encephalitis                                                                            |
|                                                            | Meningitis                                                                              |
|                                                            | Neoplasm/tumour of brain of meninges – malignant or benign (includes secondary tumours) |
|                                                            | Neoplasm/tumour of cranial nerves                                                       |
|                                                            | Intracranial abscess                                                                    |
|                                                            | Hydrocephalus                                                                           |
|                                                            | Toxic encephalopathy                                                                    |
| <i>Metabolic encephalopathy*</i>                           |                                                                                         |
| 2.21 Traumatic, Open Injury                                |                                                                                         |
| 2.22 Traumatic, Closed Injury                              |                                                                                         |
| Neurologic Conditions                                      | 3.1 Multiple Sclerosis                                                                  |
|                                                            | 3.2 Parkinsonism                                                                        |
|                                                            | 3.3 Polyneuropathy                                                                      |
|                                                            | 3.4 Guillain-Barré Syndrome                                                             |
|                                                            | 3.8 Neuromuscular Disorders                                                             |
|                                                            | Post poliomyelitis/post-polio syndrome                                                  |
|                                                            | Motor neurone disease                                                                   |
|                                                            | Muscular dystrophies and other myopathies                                               |
|                                                            | 3.9 Other Neurologic Disorders                                                          |
|                                                            | Other extrapyramidal disease and abnormal movement disorders                            |
| Spinocerebellar disease                                    |                                                                                         |
| Disorders of the autonomic nervous system                  |                                                                                         |
| <i>Epilepsy*</i>                                           |                                                                                         |
| Other demyelinating diseases of the central nervous system |                                                                                         |

*Note.* \* indicates a diagnosis included in the cohort that was not taken from the AROC code

STROBE Statement—Checklist of items that should be included in reports of *cohort studies*

|                              | Item No | Recommendation                                                                                                                                                                                                                                                                                                         | Page No                    |
|------------------------------|---------|------------------------------------------------------------------------------------------------------------------------------------------------------------------------------------------------------------------------------------------------------------------------------------------------------------------------|----------------------------|
| <b>Title and abstract</b>    | 1       | (a) Indicate the study's design with a commonly used term in the title or the abstract<br>(b) Provide in the abstract an informative and balanced summary of what was done and what was found                                                                                                                          | 1,2<br>2                   |
| <b>Introduction</b>          |         |                                                                                                                                                                                                                                                                                                                        |                            |
| Background/rationale         | 2       | Explain the scientific background and rationale for the investigation being reported                                                                                                                                                                                                                                   | 4                          |
| Objectives                   | 3       | State specific objectives, including any prespecified hypotheses                                                                                                                                                                                                                                                       | 5                          |
| <b>Methods</b>               |         |                                                                                                                                                                                                                                                                                                                        |                            |
| Study design                 | 4       | Present key elements of study design early in the paper                                                                                                                                                                                                                                                                | 6                          |
| Setting                      | 5       | Describe the setting, locations, and relevant dates, including periods of recruitment, exposure, follow-up, and data collection                                                                                                                                                                                        | 6-8                        |
| Participants                 | 6       | (a) Give the eligibility criteria, and the sources and methods of selection of participants. Describe methods of follow-up<br>(b) For matched studies, give matching criteria and number of exposed and unexposed                                                                                                      | 8,9<br>n/a                 |
| Variables                    | 7       | Clearly define all outcomes, exposures, predictors, potential confounders, and effect modifiers. Give diagnostic criteria, if applicable                                                                                                                                                                               | 9                          |
| Data sources/<br>measurement | 8*      | For each variable of interest, give sources of data and details of methods of assessment (measurement). Describe comparability of assessment methods if there is more than one group                                                                                                                                   | Table 1                    |
| Bias                         | 9       | Describe any efforts to address potential sources of bias                                                                                                                                                                                                                                                              | n/a                        |
| Study size                   | 10      | Explain how the study size was arrived at                                                                                                                                                                                                                                                                              | 6                          |
| Quantitative variables       | 11      | Explain how quantitative variables were handled in the analyses. If applicable, describe which groupings were chosen and why                                                                                                                                                                                           | 9,10                       |
| Statistical methods          | 12      | (a) Describe all statistical methods, including those used to control for confounding<br>(b) Describe any methods used to examine subgroups and interactions<br>(c) Explain how missing data were addressed<br>(d) If applicable, explain how loss to follow-up was addressed<br>(e) Describe any sensitivity analyses | 10                         |
| <b>Results</b>               |         |                                                                                                                                                                                                                                                                                                                        |                            |
| Participants                 | 13*     | (a) Report numbers of individuals at each stage of study—eg numbers potentially eligible, examined for eligibility, confirmed eligible, included in the study, completing follow-up, and analysed<br>(b) Give reasons for non-participation at each stage<br>(c) Consider use of a flow diagram                        | 6<br>n/a                   |
| Descriptive data             | 14*     | (a) Give characteristics of study participants (eg demographic, clinical, social) and information on exposures and potential confounders<br>(b) Indicate number of participants with missing data for each variable of interest<br>(c) Summarise follow-up time (eg, average and total amount)                         | 10-13<br>Tables 2,4,5<br>9 |
| Outcome data                 | 15*     | Report numbers of outcome events or summary measures over time                                                                                                                                                                                                                                                         | n/a                        |

|    |                          |    |                                                                                                                                                                                                              |         |
|----|--------------------------|----|--------------------------------------------------------------------------------------------------------------------------------------------------------------------------------------------------------------|---------|
| 1  | Main results             | 16 | (a) Give unadjusted estimates and, if applicable, confounder-adjusted estimates and their precision (eg, 95% confidence interval). Make clear which confounders were adjusted for and why they were included | n/a     |
| 2  |                          |    | (b) Report category boundaries when continuous variables were categorized                                                                                                                                    | Table 4 |
| 3  |                          |    | (c) If relevant, consider translating estimates of relative risk into absolute risk for a meaningful time period                                                                                             | n/a     |
| 4  | Other analyses           | 17 | Report other analyses done—eg analyses of subgroups and interactions, and sensitivity analyses                                                                                                               | n/a     |
| 5  | <b>Discussion</b>        |    |                                                                                                                                                                                                              |         |
| 6  | Key results              | 18 | Summarise key results with reference to study objectives                                                                                                                                                     | n/a     |
| 7  | Limitations              | 19 | Discuss limitations of the study, taking into account sources of potential bias or imprecision. Discuss both direction and magnitude of any potential bias                                                   | 14      |
| 8  | Interpretation           | 20 | Give a cautious overall interpretation of results considering objectives, limitations, multiplicity of analyses, results from similar studies, and other relevant evidence                                   | 14      |
| 9  | Generalisability         | 21 | Discuss the generalisability (external validity) of the study results                                                                                                                                        | n/a     |
| 10 | <b>Other information</b> |    |                                                                                                                                                                                                              |         |
| 11 | Funding                  | 22 | Give the source of funding and the role of the funders for the present study and, if applicable, for the original study on which the present article is based                                                | 15      |

\*Give information separately for exposed and unexposed groups.

**Note:** An Explanation and Elaboration article discusses each checklist item and gives methodological background and published examples of transparent reporting. The STROBE checklist is best used in conjunction with this article (freely available on the Web sites of PLoS Medicine at <http://www.plosmedicine.org/>, Annals of Internal Medicine at <http://www.annals.org/>, and Epidemiology at <http://www.epidem.com/>). Information on the STROBE Initiative is available at <http://www.strobe-statement.org>.

# BMJ Open

## Cohort Profile: The Acquired Brain Injury Community Rehabilitation and Support Services Outcomes Cohort (ABI-REStART), Western Australia, 1991-2020

|                                 |                                                                                                                                                                                                                                                                                                                          |
|---------------------------------|--------------------------------------------------------------------------------------------------------------------------------------------------------------------------------------------------------------------------------------------------------------------------------------------------------------------------|
| Journal:                        | <i>BMJ Open</i>                                                                                                                                                                                                                                                                                                          |
| Manuscript ID                   | bmjopen-2021-052728.R1                                                                                                                                                                                                                                                                                                   |
| Article Type:                   | Cohort profile                                                                                                                                                                                                                                                                                                           |
| Date Submitted by the Author:   | 22-Jun-2021                                                                                                                                                                                                                                                                                                              |
| Complete List of Authors:       | Mann, Georgina; Brightwater Care Group, Brightwater Research Centre Troeung, Lakkhina; Brightwater Care Group, Brightwater Research Centre<br>Wagland, Janet; Brightwater Care Group, Disability Services<br>Martini, Angelita; Brightwater Care Group, Brightwater Research Centre; The University of Western Australia |
| <b>Primary Subject Heading</b>: | Neurology                                                                                                                                                                                                                                                                                                                |
| Secondary Subject Heading:      | Neurology, Health services research                                                                                                                                                                                                                                                                                      |
| Keywords:                       | REHABILITATION MEDICINE, Stroke < NEUROLOGY, Neurological injury < NEUROLOGY                                                                                                                                                                                                                                             |
|                                 |                                                                                                                                                                                                                                                                                                                          |

SCHOLARONE™  
Manuscripts



I, the Submitting Author has the right to grant and does grant on behalf of all authors of the Work (as defined in the below author licence), an exclusive licence and/or a non-exclusive licence for contributions from authors who are: i) UK Crown employees; ii) where BMJ has agreed a CC-BY licence shall apply, and/or iii) in accordance with the terms applicable for US Federal Government officers or employees acting as part of their official duties; on a worldwide, perpetual, irrevocable, royalty-free basis to BMJ Publishing Group Ltd ("BMJ") its licensees and where the relevant Journal is co-owned by BMJ to the co-owners of the Journal, to publish the Work in this journal and any other BMJ products and to exploit all rights, as set out in our [licence](#).

The Submitting Author accepts and understands that any supply made under these terms is made by BMJ to the Submitting Author unless you are acting as an employee on behalf of your employer or a postgraduate student of an affiliated institution which is paying any applicable article publishing charge ("APC") for Open Access articles. Where the Submitting Author wishes to make the Work available on an Open Access basis (and intends to pay the relevant APC), the terms of reuse of such Open Access shall be governed by a Creative Commons licence – details of these licences and which [Creative Commons](#) licence will apply to this Work are set out in our licence referred to above.

Other than as permitted in any relevant BMJ Author's Self Archiving Policies, I confirm this Work has not been accepted for publication elsewhere, is not being considered for publication elsewhere and does not duplicate material already published. I confirm all authors consent to publication of this Work and authorise the granting of this licence.



Cohort Profile: ABI-REStART, 1991-2020

1

**Cohort Profile: The Acquired Brain Injury Community REhabilitation and Support  
Services OuTcomes CohoRT (ABI-REStART), Western Australia, 1991-2020**

Georgina MANN, PhD<sup>1</sup>, Lakkhina TROEUNG, PhD<sup>1</sup>, Janet WAGLAND, BSc<sup>2</sup>, Angelita  
MARTINI, PhD<sup>1,3</sup>

<sup>1</sup>Brightwater Research Centre, Brightwater Care Group, Perth, Australia

<sup>2</sup>Disability Services, Brightwater Care Group, Perth, Australia

<sup>3</sup>The University of Western Australia, Perth, Australia

Correspondence to: Dr. Georgina Mann

Research Officer, Brightwater Research Centre

355 Scarborough Beach Rd, Osborne Park WA 6017 Australia

+ 61 8 9202 3561

[Georgina.Mann@brightwatergroup.com](mailto:Georgina.Mann@brightwatergroup.com)

Word count: 3,849

## Abstract

**Purpose:** Transition into the community following acute management of acquired brain injury (ABI) is a critical part of recovery. Post-acute rehabilitation and transitional care can significantly improve outcomes. The Acquired Brain Injury Community REhabilitation and Support Services OuTcomes CohoRT (ABI-REStART) is a novel whole-population cohort formed to better understand the needs of individuals with ABI receiving post-acute rehabilitation and disability services in Western Australia (WA), and to improve their outcomes. To do this a unique combination of i) internal clinical/rehabilitation data, and ii) externally linked health data from the WA Data Linkage System was used, including hospitalisations, emergency department presentations, mental health service use, and death records, to measure longitudinal needs and outcomes of individuals with ABI over 29 years, making this the largest, most diverse post-acute ABI cohort in Australia to date.

**Participants:** Whole-population cohort of individuals ( $n = 1,011$ ) with an ABI who received post-acute community-based neurorehabilitation or disability support services through Brightwater Care Group from 1991-2020.

**Findings to date:** Comprehensive baseline demographic, clinical and rehabilitation data, outcome measures and linked health data have been collected and analysed. Non-traumatic brain injury (e.g. stroke, hypoxia) was the main diagnostic group (54.9%,  $n=555$ ), followed by traumatic brain injury (34.9%,  $n=353$ ) and eligible neurologic conditions (10.2%,  $n=103$ ). Mean age at admission was 45.4 years, and 67.5% were male ( $n=682$ ). The cohort demonstrated significant heterogeneity, socially and clinically, with differences between ABI groups across a number of domains.

**Future plans:** ABI-REStART is a dynamic whole-population cohort that will be updated over time as individuals enrol in the service. Future analyses will assess longitudinal brain injury outcomes, the changing health and social needs of individuals with ABI, and evaluate and inform post-acute services to best support these individuals.

**Registration:** This cohort is not linked to a clinical trial, and is not registered.

### Strengths and Limitations

- ABI-RESTART is the largest Australian post-acute neurorehabilitation and disability support cohort to date with a 29 year follow-up period.
- The combined use of internal clinical and rehabilitation data and linked health data provides a detailed picture of ABI that could not be derived from a single data source, with key measures including functional independence, health status and comorbidities, goal attainment, mental health and well-being, quality of life, and mortality, offering a unique, holistic understanding of the needs and outcomes of individuals with ABI
- The cohort represents a diverse and complex population including individuals with non-traumatic brain injury, traumatic brain injury, and eligible neurologic conditions, providing a diverse range of brain injury experiences.
- The study framework follows each cohort member from pre-injury to long-term follow-up after discharge from post-acute services, with a minimum 10-year lookback period (starting from 1981) and a mean follow-up time of 8.4 years following discharge.
- A state-based data linkage register was used, so pre-admission or post-discharge follow-up data for cohort members based interstate or overseas will not be captured, and all clients were accessing services at a single organisation which may reduce the generalisability of findings.

## 54 Introduction

55 Acquired brain injury (ABI) is one of the leading causes of death and disability in  
56 Australia<sup>1</sup>. Defined as any damage to the brain occurring after birth, ABI can be traumatic  
57 (caused by extrinsic forces to the head) or non-traumatic (e.g. stroke, drug misuse, tumour,  
58 hypoxia/anoxia). Estimates suggest 2% of the population of Western Australia (WA) are  
59 living with an ABI<sup>2</sup>. The consequences of ABI are complex and difficult to predict, but often  
60 lead to a range of impairments in cognitive, physical and psychosocial functioning<sup>1-4</sup>. ABI  
61 can cause long-term physical disability and complex neuro-behavioural effects. These can  
62 include neurological impairment (e.g. motor function, sensory loss), medical complications  
63 (e.g. spasticity, epilepsy), cognitive impairment (e.g. memory deficits, language impairments,  
64 reduced consciousness), personality and behavioural changes (e.g. impaired social skills) and  
65 lifestyle consequences (e.g. loss of independence, reduced quality of life)<sup>5</sup>. Up to 75% of  
66 brain injuries in Australia occur in adults under 65 years of age<sup>3</sup>, resulting in difficulties that  
67 can impact working ability, social engagement and community integration<sup>6-8</sup>.

68 Regaining independence and/or meaningful participation in life following an ABI is  
69 achievable. Transition back into the community following acute management of ABI in  
70 hospital is a critical phase of recovery, and adjustment to the cognitive, physical and  
71 behavioural impairments associated with ABI during transition predicts longer-term  
72 outcomes and overall recovery from brain injury<sup>9,10</sup>. Post-acute care is important throughout  
73 the transition from acute services, such as hospitalisation, to home or community care, with  
74 clients and families often reporting the transition to be difficult and stressful<sup>10</sup>. Individuals  
75 with inadequate supports risk poorer outcomes including development of a depressive  
76 disorder<sup>9</sup>, re-hospitalisation or institutionalisation<sup>10</sup> and reduced likelihood of returning to  
77 work<sup>6</sup>.

1  
2  
3 78 Post-acute care is defined as care occurring after the acute care period, with  
4  
5 79 individuals who have achieved acute recovery, are medically stable, and no longer requiring  
6  
7 80 hospitalisation<sup>11</sup>. Post-acute care may occur immediately following discharge from hospital  
8  
9 81 or at any time after the individual has achieved medical stability<sup>12</sup>. The focus of post-acute  
10  
11 82 care is on functional improvement and/or to support individuals to achieve meaningful  
12  
13 83 participation in life, as distinct from physiological recovery.  
14  
15

16  
17 84 Despite the importance of post-acute care for individuals with an ABI, little empirical  
18  
19 85 evidence is available to enable service planning and policy development for this cohort. A  
20  
21 86 number of community-based neurorehabilitation cohort studies examining the outcomes of  
22  
23 87 individuals with ABI after rehabilitation exist in Australia<sup>13-16</sup>. Two of these studies involved  
24  
25 88 retrospective analysis of client data at discharge from community-based brain injury services  
26  
27 89 in which individualized rehabilitation care was provided. The first study showed that ABI  
28  
29 90 clients (n=63) who received rehabilitation services in Queensland between 2017-2018 had  
30  
31 91 significantly improved physical outcomes compared with a historical ABI cohort who did not  
32  
33 92 receive rehabilitation services between 2007-2009 (n=124)<sup>14</sup>. The second study, conducted  
34  
35 93 with 47 ABI clients in South Australia from 2010-2013, demonstrated that outpatient  
36  
37 94 rehabilitation significantly and immediately improved physical and psychosocial outcomes,  
38  
39 95 although social wellbeing declined in the follow-up period<sup>13</sup>. Client experiences of  
40  
41 96 community-based rehabilitation have also been examined, with one study surveying clients (n  
42  
43 97 = 79) and their families (n = 39) experiences following attendance to a brain injury  
44  
45 98 rehabilitation unit in New South Wales from 2015-2017. This study indicated that person-  
46  
47 99 centred care was critical to an individuals' experience of care across a number of post-acute  
48  
49 100 services<sup>15</sup>. While this research has demonstrated the value of community-based rehabilitation,  
50  
51 101 these cohort studies have small sample sizes (<200), and short follow-up times (<3years).  
52  
53 102 Longer-term research examining the experiences of individuals accessing post-acute ABI  
54  
55  
56  
57  
58  
59  
60

103 services and the effectiveness of different types of post-acute care is required to ensure the  
104 best outcomes for individuals.

### 105 **ABI-REStART**

106 The Acquired Brain Injury Community REhabilitation and Support Services  
107 OuTcomes CohoRT (ABI-REStART) is the largest research cohort of people with ABI who  
108 received post-acute rehabilitation or support services in Australia to date. The cohort is a  
109 whole-population cohort comprising of all individuals who received brain injury services  
110 through Brightwater Care Group in WA, from 1991-2020. Brightwater has been a main  
111 provider of post-acute community-based disability services for people with acquired brain  
112 injury in WA since 1991<sup>17</sup>, with the goal to support people to meaningfully '*restart*' their  
113 lives in the community after ABI.

114 The ABI-REStART research program uses a unique combination of internal clinical  
115 and rehabilitation data and external linked health data collections from the WA Data Linkage  
116 System<sup>18</sup>. This enables longitudinal examination of the needs and outcomes of individuals  
117 with ABI over 29 years, making this the longest follow-up of individuals with ABI  
118 undergoing post-acute care in Australia to date<sup>13-15</sup>. The aim of the ABI-REStART research  
119 program will focus on understanding the complex health and social needs of people with ABI  
120 during post-acute care, and identify predictors of short- and long-term outcomes to facilitate  
121 effective service planning and delivery.

### 122 **Aims**

123 This cohort profile paper aims to: 1) describe the background and formation of ABI-  
124 REStART, 2) outline data sources and , key variables, 3) present baseline sociodemographic  
125 and clinical characteristics, and 4) outline planned research for the cohort. Future publications  
126 will examine the specific outcomes of the cohort.

127

## 128 Cohort Description

### 129 Cohort Design and Eligibility

130 ABI-REStART is a retrospective whole-population cohort comprising all clients of  
 131 Brightwater Care Group's post-acute brain injury programs and services (excluding respite)  
 132 from inception on March 15, 1991 to December 31, 2020 ( $n=1,011$ ). Each individual's entry  
 133 date into the cohort represents the date of their index admission (first episode of care) to  
 134 Brightwater's community-based brain injury services.

135 The cohort consists of individuals with diverse brain injuries, including traumatic brain  
 136 injuries (TBI), non-traumatic brain injuries (NTBI) and eligible neurologic conditions,  
 137 defined by the Australian Rehabilitation Outcomes Centre (AROC) impairment codes<sup>19</sup>.  
 138 Table 1 summarises AROC diagnostic categories for the cohort. NTBI were the leading  
 139 diagnostic category in the cohort (54.9%; 555 of 1,011) with stroke (52.6%; 292 of 555)  
 140 comprising over half of NTBI diagnoses. TBI accounted for 34.9% of the cohort (353 of  
 141 1,011).

142 **Table 1. Brain injury diagnoses and Australasian Rehabilitation Outcomes Centre**  
 143 **(AROC) Impairment Codes for the ABI-REStART cohort, 1991-2020**

| AROC Code, Category and Diagnosis               |                                                         | n (%)      |
|-------------------------------------------------|---------------------------------------------------------|------------|
| <b>Non-traumatic (Stroke)</b>                   |                                                         | 292 (28.9) |
| 1.1                                             | Stroke – Haemorrhagic                                   | 81 (8.0)   |
| 1.2                                             | Stroke – Ischemic                                       | 178 (17.6) |
| 1.0                                             | Stroke – Unspecified                                    | 33 (3.3)   |
| <b>Non-traumatic (other - excluding stroke)</b> |                                                         | 263 (26.0) |
| 2.11                                            | Subarachnoid haemorrhage                                | 58 (5.7)   |
| 2.12                                            | Anoxic brain damage                                     | 78 (7.7)   |
| 2.13                                            | Encephalitis                                            | 18 (1.8)   |
|                                                 | Meningitis                                              | 6 (0.6)    |
|                                                 | Neoplasm/tumour of brain, meninges<br>or cranial nerves | 32 (3.2)   |
|                                                 | Intracranial abscess                                    | 2 (0.2)    |
|                                                 | Hydrocephalus                                           | 5 (0.5)    |
|                                                 | Toxic encephalopathy                                    | 35 (3.5)   |
|                                                 | Metabolic encephalopathy                                | 7 (0.7)    |

|                   |                                                  |            |
|-------------------|--------------------------------------------------|------------|
|                   | Other non-traumatic brain dysfunction            | 22 (2.2)   |
| <b>Traumatic</b>  |                                                  | 353 (34.9) |
| 2.21              | Traumatic, open injury                           | 50 (5.0)   |
| 2.22              | Traumatic, closed injury                         | 280 (27.7) |
| 2.2               | Traumatic, unspecified                           | 23 (2.3)   |
| <b>Neurologic</b> |                                                  | 103 (10.2) |
| 3.1               | Multiple sclerosis                               | 16 (1.6)   |
| 3.2               | Parkinsonism                                     | 17 (1.7)   |
| 3.3               | Polyneuropathy                                   | 3 (0.3)    |
| 3.4               | Guillain-Barré Syndrome                          | 1 (0.1)    |
| 3.8               | Neuromuscular Disorders                          | 13 (1.3)   |
| 3.9               | Extrapyramidal and abnormal movement disorders   | 2 (0.2)    |
|                   | Spinocerebellar disease                          | 3 (0.3)    |
|                   | Epilepsy                                         | 31 (3.1)   |
|                   | Other neurologic and neurodegenerative disorders | 17 (1.7)   |

144

145

146

147

148

149

150

151

152

153

154

155

156

157

Each individual's AROC diagnosis represents their primary brain injury diagnosis at index admission to Brightwater, but not necessarily their index brain injury. It is possible for individuals to have had prior brain injuries for which they did not access Brightwater services. Individuals with congenital neurologic conditions (e.g. cerebral palsy, spina bifida) or intellectual disabilities are eligible for services at Brightwater, but were excluded from the cohort. Admissions are accepted any time since injury, most often in the sub-acute (3-12 months post-injury) or chronic phases (>12 months post-injury)<sup>20,21</sup>.

### Cohorts, Setting and Programs

The overall cohort is comprised of four service delivery periods based on year of index admission to services: 1991-2002, 2003-2007, 2008-2013, and 2014-2020. These periods reflect significant change to service delivery programs. Key changes are specified in Table 2.



158 **Table 2. Key changes to programs across four service delivery periods.**

| Service Period   | Program<br>(start date) | Service Changes                                                                                                                                                                                                                                                                                                                                     |
|------------------|-------------------------|-----------------------------------------------------------------------------------------------------------------------------------------------------------------------------------------------------------------------------------------------------------------------------------------------------------------------------------------------------|
| <b>1991-2002</b> | <b>TRP (1991)</b>       | 1) Commencement of the Transitional Rehabilitation Program on the Oats Street site (24 beds).<br>2) Inclusion for TRP:<br>a. No more than 1 support worker;<br>b. At least 1 personally-relevant goal;<br>c. Some supportive social network;<br>d. No interfering comorbid health conditions;<br>e. Able to independently complete basic self-care. |
|                  | <b>SIL (1998)</b>       | 3) Commencement of long-stay brain injury accommodation.                                                                                                                                                                                                                                                                                            |
| <b>2003-2007</b> | <b>TRP</b>              | 1) Increase in number of TRP beds <b>and</b> program expands to two sites (Oats Street and Marangaroo).<br>2) Introduction of staged approach to ability-based graduation through houses at Oats Street.                                                                                                                                            |
| <b>2008-2013</b> | <b>TRP</b>              | 1) Increase in number of beds to include on-site independent living units for more independent clients.<br>2) Change in inclusion criteria:<br>a. Reduced restrictions around comorbid health conditions;<br>b. No requirement for self-care ability;<br>c. More than 1 support worker permitted (inclusion of minimally conscious clients).        |
|                  | <b>TAP (2008)</b>       | 3) Transitional Accommodation Program introduced.                                                                                                                                                                                                                                                                                                   |
|                  | <b>HACC SS (2009)</b>   | 4) HACC Social Support Program introduced.                                                                                                                                                                                                                                                                                                          |
| <b>2014-2020</b> | <b>TRP</b>              | 1) Increase in number of beds to 43.<br>2) Transitional Rehabilitation Program reduced to a single site (Oats Street).                                                                                                                                                                                                                              |
|                  | <b>CAPB (2016)</b>      | 3) Capacity Building Program introduced.                                                                                                                                                                                                                                                                                                            |
|                  | <b>HACC SS</b>          | 4) HACC SS clients began transitioning into CAPB program and HACC program closed down.                                                                                                                                                                                                                                                              |

*Note.* TRP = Transitional Rehabilitation Program; SIL = Supported Independent Living; TAP = Transitional Accommodation Program; HACC SS = Home and Community Care Social Support; CAPB = Capacity Building

1  
2  
3 159 Clients are able to be re-referred to Brightwater programs, or transferred between  
4  
5 160 programs, as their goals and abilities change, and therefore can have multiple episodes of  
6  
7 161 care. However, clients can only be enrolled in a single program at any one time.  
8  
9

10 162 All programs accept clients between the ages of 18-65 years, however acceptance to  
11  
12 163 each program is on a case-by-case basis. As such, some individuals outside of those age  
13  
14 164 ranges have been admitted throughout the duration of the programs. The five different  
15  
16 165 community-based programs are summarized below, ranging from full-time residential  
17  
18 166 neurorehabilitation to casual home-based supports.  
19  
20  
21

### 22 167 ***Transitional Rehabilitation Program***

23  
24 168 Beginning in 1991, the Transitional Rehabilitation Program was Brightwater's first  
25  
26 169 post-acute service for individuals with ABI and/or eligible neurologic conditions. The  
27  
28 170 program is delivered at the *Oats Street* rehabilitation centre, a purpose-built community-  
29  
30 171 based residential facility. The program is funded by the WA Department of Health and can  
31  
32 172 support up to 43 live-in residents, across 8 group houses and 8 independent living units, plus  
33  
34 173 10 additional home-based clients.  
35  
36  
37

38 174 The Transitional Rehabilitation Program has a typical duration of 12-24 months, and  
39  
40 175 aims to enable clients to regain the skills to live independently in the community. Clients  
41  
42 176 participate in evidence-based, person-centred neurorehabilitation that is tailored to their  
43  
44 177 individual goals, and are supported by an integrated multidisciplinary team of medical and  
45  
46 178 allied health professionals.  
47  
48  
49

50 179 The Transitional Rehabilitation Program is based on a novel model of care called  
51  
52 180 Staged Community-Based Brain Injury Rehabilitation, whereby post-acute therapy and care  
53  
54 181 services are provided in a stage-based approach to support a client's continued recovery from  
55  
56 182 ABI over time<sup>22-24</sup>. On admission, clients are allocated to a house with levels of assistance  
57  
58 183 appropriate for their needs, ranging from 24 hour continuous care to full independence, and  
59  
60

1  
2  
3 184 graduate through stages with decreasing levels of support as their independence and  
4  
5 185 functional abilities improve<sup>24</sup>. The program is able to support all stages of brain injury  
6  
7 186 rehabilitation, from profound physical disability (including those in a minimally conscious  
8  
9 187 state, in which there is reduced consciousness with evidence of environmental awareness<sup>25</sup>)  
10  
11  
12 188 to higher-level cognitive rehabilitation.  
13  
14

### 15 189 ***Supported Independent Living***

16  
17 190 Beginning in 1998, Supported Independent Living is a supported accommodation  
18  
19 191 program for individuals with ABI who are funded by the Australian Governments' National  
20  
21 192 Disability Insurance Scheme<sup>26</sup> (NDIS; from 2016), or Disability Service Commission (DSC;  
22  
23 193 prior to 2016), or with private funding, and who require additional supports to carry out  
24  
25 194 activities of daily living but do not seek neurorehabilitation<sup>27</sup>. Individuals in this program live  
26  
27 195 across 8 shared houses for people with disability throughout the Perth metropolitan area.  
28  
29  
30

### 31 196 ***Transitional Accommodation Program***

32  
33 197 The Transitional Accommodation Program commenced in 2008 and is funded by the WA  
34  
35 198 Department of Health as a step down from hospital service<sup>28</sup>. Referrals must come from a  
36  
37 199 Perth metropolitan public hospital, and clients receive transitional care and short-term  
38  
39 200 accommodation while they are supported to seek longer-term accommodation or make  
40  
41 201 adjustments to existing homes. This program operates in a socio-medical model, using short-  
42  
43 202 term therapy, nursing and care supports to keep clients healthy and medically stable to  
44  
45 203 promote natural recovery but does not involve comprehensive active rehabilitation. Clients in  
46  
47 204 the program can utilise NDIS funding to engage in activities and have sustainable discharge  
48  
49 205 options. The Transitional Accommodation Program often involves setting up support  
50  
51 206 structures for people with complex disabilities, including nursing and psychosocial  
52  
53 207 complexity.  
54  
55  
56  
57  
58  
59  
60

### 208 ***Home and Community Care Social Skills***

209 Commencing in 2009, the Home and Community Care Social Skills program  
210 provided support, privately, with Commonwealth Department of Health funding, for social  
211 engagement and activities as well as in-home care as required. This program was for  
212 individuals with ABI who were at risk of social isolation or needed support around the home  
213 to maintain their independence. This program began to be phased out in 2016 when the  
214 Capacity Building program began, with no new clients accepted into the program after June  
215 2019<sup>29</sup>.

### 216 ***Capacity Building***

217 The Capacity Building program was launched in 2016 to replace the Home and  
218 Community Care Social Skills program. Capacity Building offers home-based supports to  
219 individuals with ABI who have NDIS funding. The supports on offer include specialist  
220 neurorehabilitation therapy services, support coordination, equipment and assistive  
221 technology, and behavioural assessment and support. Capacity Building clients are able to  
222 access services on an ad-hoc basis as determined by the client themselves, and have  
223 individually tailored rehabilitation or lifestyle goals that are achieved while living off-site.

### 224 **Data Sources and Follow-Up Time**

225 Figure 1a summarizes the data sources for ABI-REStART. The research program uses  
226 a combination of internal clinical and rehabilitation data, and externally linked data  
227 collections from the WA Department of Health. Internal electronic medical records for each  
228 cohort member were probabilistically linked through the WA Data Linkage System<sup>18</sup> to four  
229 external health data collections. We obtained data on hospitalizations (hospital morbidity data  
230 collection; 1981-2020), emergency department (ED) presentations (ED data collection; 2002-  
231 2020), deaths (mortality register, 1991-2020) and mental health (mental health information  
232 system; 1981-2020). The combination of internal and external data sources allows

1  
2  
3 233 triangulation of information to ensure higher accuracy, continuity, and completeness than  
4  
5 234 could be derived from a single source.

6  
7 235 Figure 1b summarizes the ABI-REStART design and follow-up time. The study  
8  
9 236 framework follows each cohort member from pre-injury, acute care, post-acute care and long-  
10  
11 237 term follow-up after discharge from post-acute services. For all cohort members, a minimum  
12  
13 238 10-year pre-admission lookback period is available to examine pre-injury morbidity patterns  
14  
15 239 and acute care details. Linked data are obtained up to December 31, 2020, with a mean  
16  
17 240 follow-up time of 8.4 years (range 0y-29.2y) following discharge from community-based  
18  
19 241 services for each cohort member.  
20  
21  
22

### 23 242 **Key Measures, Variables and Outcomes**

24 243 Key outcome measures and variables available for ABI-REStART are summarized in  
25  
26 244 Table 3. Study variables are primarily derived from clinical and administrative data collected  
27  
28 245 as part of routine service provision. Key variables span five categories (Admissions,  
29  
30 246 Demographics, Clinical, Rehabilitation, and Psychosocial), offering a unique, holistic  
31  
32 247 understanding of the needs and outcomes of individuals with ABI. Outcomes for each cohort  
33  
34 248 member include functional independence, health status and comorbidities, goal attainment,  
35  
36 249 mental health and well-being, quality of life, and mortality.  
37  
38  
39  
40  
41  
42  
43  
44  
45  
46  
47  
48  
49  
50  
51  
52  
53  
54  
55  
56  
57  
58  
59  
60

251 **Table 3. Data sources, key measures and variables available for the ABI-REStART study**

|                 | Date        | Data Source/Type            | Description                                                                                                                                                                                                                                                               | Key Variables                                                                                                                                                                                                                                                                                                     |
|-----------------|-------------|-----------------------------|---------------------------------------------------------------------------------------------------------------------------------------------------------------------------------------------------------------------------------------------------------------------------|-------------------------------------------------------------------------------------------------------------------------------------------------------------------------------------------------------------------------------------------------------------------------------------------------------------------|
|                 | 1991 - 2020 | Admissions                  | <ul style="list-style-type: none"> <li>Admission &amp; discharge date</li> <li>Facility</li> <li>Programs</li> <li>Referral source</li> </ul>                                                                                                                             | <ul style="list-style-type: none"> <li>Time since injury to admission</li> <li>Admission source</li> <li>Admission program</li> <li>Admission and discharge dates</li> <li>Age at admission</li> </ul>                                                                                                            |
|                 | 1991 - 2020 | Demographics                | <ul style="list-style-type: none"> <li>Demographics</li> <li>Social background</li> </ul>                                                                                                                                                                                 | <ul style="list-style-type: none"> <li>Age at injury</li> <li>Gender</li> <li>Indigenous status</li> <li>Country of birth</li> <li>Usual occupation</li> <li>SEIFA IRSD<sup>30</sup></li> <li>ASGS Remoteness Area<sup>31</sup></li> </ul>                                                                        |
|                 | 1991 - 2020 | Clinical                    | <ul style="list-style-type: none"> <li>Diagnoses</li> <li>Vital signs / observations</li> <li>Medications</li> <li>Investigations (pathology, radiology)</li> <li>Medical &amp; allied health consultation notes</li> <li>Medical correspondence and referrals</li> </ul> | <ul style="list-style-type: none"> <li>ABI type (TBI, NTBI, neurologic)</li> <li>Injury location (unilateral, bilateral)</li> <li>Cause of injury</li> <li>Severity (Glasgow Coma Scale <sup>32</sup>, post-traumatic amnesia, loss of consciousness)</li> <li>Injury phase (acute, subacute, chronic)</li> </ul> |
|                 | 1991 - 2020 | Rehabilitation              | <ul style="list-style-type: none"> <li>Australasian Rehabilitation Outcomes Centre (AROC) Impairment Code</li> <li>Outcome measures</li> </ul>                                                                                                                            | <ul style="list-style-type: none"> <li>FIM+FAM<sup>33</sup></li> <li>MPAI-4<sup>34</sup></li> <li>GAS<sup>35</sup></li> <li>RCS<sup>36</sup></li> </ul>                                                                                                                                                           |
|                 | 1991 - 2020 | Psychosocial                | <ul style="list-style-type: none"> <li>Mental health</li> <li>Quality of life</li> <li>Behavioural</li> <li>Well-being</li> </ul>                                                                                                                                         | <ul style="list-style-type: none"> <li>QOLIBRI<sup>37,38</sup></li> <li>NPTDA<sup>39</sup></li> <li>NPDS<sup>40</sup></li> </ul>                                                                                                                                                                                  |
| <b>EXTERNAL</b> | 1981 - 2020 | Hospital (HMDC)             | <ul style="list-style-type: none"> <li>Hospital admissions and separations for all public and private hospitals in WA</li> </ul>                                                                                                                                          | <ul style="list-style-type: none"> <li>Comorbidities</li> <li>Comorbidity severity</li> <li>Surgical procedures</li> <li>Health service use patterns</li> </ul>                                                                                                                                                   |
|                 | 2002 - 2020 | Emergency department (EDDC) | <ul style="list-style-type: none"> <li>ED presentations at all public and private hospitals in WA</li> </ul>                                                                                                                                                              |                                                                                                                                                                                                                                                                                                                   |
|                 | 1981 - 2020 | Mental health (MHIS)        | <ul style="list-style-type: none"> <li>Inpatient and outpatient community mental health presentations</li> </ul>                                                                                                                                                          |                                                                                                                                                                                                                                                                                                                   |
|                 | 1991 - 2020 | Deaths                      | <ul style="list-style-type: none"> <li>All deaths occurring in WA</li> </ul>                                                                                                                                                                                              | <ul style="list-style-type: none"> <li>Cause of death</li> <li>Time to death</li> </ul>                                                                                                                                                                                                                           |

*Note:* SEIFA IRSD = Socio-Economic Indexes for Areas Index of Relative Socioeconomic Disadvantage; ASGS = Australian Statistical Geography Standard; FIM+FAM = Functional Independence Measure + Functional Assessment Measure; MPAI-4 = Mayo-Portland Adaptability Inventory; GAS = Goal Attainment Scale; RCS = Rehabilitation Complexity Scale; QOLIBRI = Quality of Life After Brain Injury; NPTDA = Northwick Park Therapy Dependency Assessment; NPDS = Northwick Park Dependency Score

252

253 Table 4 outlines the availability of key outcome measures data for the cohort. As the  
 254 cohort is a retrospective pragmatic cohort, available outcome measures data for each client  
 255 differs depending on the service period, the outcome measures used at the time, and the  
 256 program the client was admitted to. Comprehensive outcome measures were introduced  
 257 across services in 2011, therefore, only a subset of the cohort have complete outcome measures.

258 **Table 4. Key ABI-REStART outcome measures and data availability, 1991-2020**  
 259 **(n=1,011)**

| Key Outcome Measures and Data                                                             | Years Available | Clients with data |                    |                         |
|-------------------------------------------------------------------------------------------|-----------------|-------------------|--------------------|-------------------------|
|                                                                                           |                 | Total number, n   | Of total cohort, % | Over years available, % |
| <b>Internal Data</b>                                                                      |                 |                   |                    |                         |
| Functional Independence Measure and Functional Assessment Measure (FIM+FAM) <sup>33</sup> | 2011–2020       | 383               | 37.9               | 57.0                    |
| Mayo-Portland Adaptability Inventory-4 (MPAI-4) <sup>34</sup>                             | 2011–2020       | 468               | 46.3               | 69.6                    |
| Goal Attainment Scale (GAS) <sup>35</sup>                                                 | 2011–2020       | 362               | 35.8               | 53.8                    |
| Quality of Life After Brain Injury Inventory (QoLIBRI) <sup>38</sup>                      | 2015–2020       | 94                | 9.3                | 19.0                    |
| Northwick Park Dependency Score (NPDS) <sup>40</sup>                                      | 2011–2020       | 405               | 40.1               | 60.3                    |
| Northwick Park Care Needs Assessment (NCPNA) <sup>39</sup>                                | 2011–2020       | 405               | 40.1               | (60.3                   |
| Rehabilitation Complexity Scale (RCS) <sup>36</sup>                                       | 2012–2020       | 354               | 35.0               | 56.9                    |
| <b>External Data</b>                                                                      |                 |                   |                    |                         |
| Hospital admissions                                                                       |                 |                   |                    |                         |
| Pre-admission                                                                             | 1981–2020       | 1,011             | 100                | -                       |
| Post-discharge (follow-up)                                                                | 1991–2020       | 829               | 81.9               | -                       |
| Emergency department presentations                                                        |                 |                   |                    |                         |
| Pre-admission                                                                             | 2002–2020       | 692               | 68.4               | -                       |
| Post-discharge (follow-up)                                                                | 2002–2020       | 342               | 33.8               | -                       |
| Mental health information system                                                          | 1981–2020       | TBD               | -                  | -                       |
| Death                                                                                     | 1991–2020       | TBD               | -                  | -                       |

260 *Note.* TBD = To be determined. Mental health data not yet received. Updated death data not yet received.

261

262

263

## 264 **Data Extraction, Storage and Security**

265 Clinical records for active and historic ABI clients are stored within a secure internal  
266 clinical application (iCare). This data can only be accessed by users with appropriate security  
267 clearance, such as the researchers involved on the project, and relevant clinical and  
268 administrative staff. Archived historic client data is retained by the organisation and used for  
269 service evaluation and research purposes as needed.

270 Researchers extracted demographic, clinical and outcome measures data for the ABI-  
271 RESTART members from the iCare data warehouse using structured query language (SQL).  
272 Linked hospital and ED data were used to validate clinical diagnosis details, date of injury  
273 and cause of injury. For historic clients, researchers manually extracted admissions,  
274 demographic, clinical and outcome measures data from scanned documents (PDF) uploaded  
275 into the client's clinical records. Researchers created a master ABI-RESTART database  
276 specifically for this study. This database is stored on a secure internal network drive which  
277 can only be accessed by the study investigators.

## 278 **Ethics**

279 Clients provided consent for their de-identified information to be used for research  
280 purposes as part of the conditions of service upon admission. Ethics approval for this research  
281 was granted by the University of Western Australia Human Research Ethics Committee  
282 (RA/4/1/9232) and the West Australian Department of Health Human Research Ethics  
283 Committee (RGS0000002894).

## 284 **Statistical Analysis**

285 Extraction and analysis of baseline data was completed in February 2021. Basic  
286 demographic and brain injury characteristics at index admission are presented in the current  
287 cohort profile. Subsequent research will examine the health status, service use, and outcomes  
288 of the cohort in detail.



289 Baseline data were analysed using STATA 16.0<sup>41</sup>. Primary analyses were tested  
 290 against an alpha level of 0.05 (uncorrected, two-tailed). Descriptive statistics were calculated  
 291 and presented as mean  $\pm$  standard deviation, or count (percentage). Independent samples t-  
 292 tests, two-way ANOVAs and  $\chi^2$  analyses were used to compare differences in continuous and  
 293 categorical outcomes, respectively. Bonferroni correction was used for multiple comparisons.

#### 294 **Patient and public involvement**

295 Patients or public were not involved in the development of the research question and  
 296 project design or conducting the present study.

#### 297 **Findings to date**

##### 298 **Sociodemographic Characteristics**

299 Table 5 summarizes the baseline sociodemographic characteristics of ABI-REStART.  
 300 Mean age at admission was  $45.4 \pm 15.5$  years (range: 14.9y–93.2y), with 6.2% aged over 65  
 301 (n=63). Male clients (67.5%) outnumbered female clients (32.5%). The relatively young age  
 302 and predominantly male cohort is consistent with other profiles of individuals seeking ABI  
 303 services<sup>13–15</sup>. The majority of the cohort was born in Australia (64.7%), with 3.4% of clients  
 304 of Indigenous and/or Torres Strait Islander background. Most of the cohort lived in a major  
 305 city (84.3%) and were between *average disadvantage* and *least disadvantaged* levels of the  
 306 Socio-Economic Index for Areas Index of Relative Socioeconomic Disadvantage (SEIFA  
 307 IRSD) before admission (76.5%).

308 **Table 5. Sociodemographic characteristics for the ABI-REStART cohort at index**  
 309 **admission to post-acute community-based brain injury support programs, 1991-2020**  
 310 **(n=1,011)**

| Characteristics | Total,<br>n=1,011 | 1991-2002,<br>n=231 | 2003-2007,<br>n=145 | 2008-2013,<br>n=220 | 2014-2020,<br>n=415 |
|-----------------|-------------------|---------------------|---------------------|---------------------|---------------------|
| Sex, n (%)      |                   |                     |                     |                     |                     |

## Cohort Profile: ABI-REStART, 1991-2020

18

|                                        |                 |                 |                 |                 |                 |
|----------------------------------------|-----------------|-----------------|-----------------|-----------------|-----------------|
| Male                                   | 682 (67.5)      | 150 (64.9)      | 108 (74.5)      | 156 (70.9)      | 268 (64.6)      |
| Female                                 | 329 (32.5)      | 81 (35.1)       | 37 (25.5)       | 64 (29.1)       | 147 (35.4)      |
| Age at admission, mean $\pm$ SD        |                 |                 |                 |                 |                 |
| Total                                  | 45.4 $\pm$ 15.5 | 44.1 $\pm$ 21.5 | 39.5 $\pm$ 12.5 | 44.2 $\pm$ 12.8 | 48.8 $\pm$ 12.9 |
| Male                                   | 44.2 $\pm$ 14.6 | 39.8 $\pm$ 18.0 | 39.9 $\pm$ 12.8 | 44.7 $\pm$ 12.3 | 48.0 $\pm$ 13.3 |
| Female                                 | 47.9 $\pm$ 17.1 | 51.9 $\pm$ 25.0 | 38.3 $\pm$ 11.6 | 43.0 $\pm$ 13.9 | 50.2 $\pm$ 12.1 |
| Age category at admission, n (%)       |                 |                 |                 |                 |                 |
| <18 years                              | 15 (1.5)        | 8 (3.5)         | 3 (2.1)         | -               | 4 (1.0)         |
| 18-29                                  | 190 (18.8)      | 66 (28.6)       | 36 (24.8)       | 40 (18.2)       | 48 (11.6)       |
| 30-39                                  | 161 (15.9)      | 46 (19.9)       | 32 (22.1)       | 34 (15.5)       | 49 (11.8)       |
| 40-49                                  | 223 (22.1)      | 43 (18.6)       | 43 (29.7)       | 54 (24.6)       | 83 (20.0)       |
| 50-59                                  | 274 (27.1)      | 19 (8.2)        | 26 (17.9)       | 78 (35.5)       | 151 (36.4)      |
| 60-69                                  | 102 (10.1)      | 7 (3.0)         | 5 (3.5)         | 14 (6.4)        | 76 (18.3)       |
| $\geq$ 70 years                        | 46 (4.6)        | 42 (18.2)       | -               | -               | 4 (1.0)         |
| Indigenous, n (%)                      |                 |                 |                 |                 |                 |
| Total                                  | 34 (3.4)        | 2 (0.9)         | -               | 13 (5.9)        | 19 (4.6)        |
| Male                                   | 24 (70.6)       | 1 (0.5)         | -               | 11 (84.6)       | 12 (63.2)       |
| Female                                 | 10 (29.4)       | 1 (0.5)         | -               | 2 (15.4)        | 7 (36.8)        |
| Mean age $\pm$ SD                      | 38.8 $\pm$ 13.6 | 31.0 $\pm$ 0.8  | -               | 40.0 $\pm$ 15.2 | 38.8 $\pm$ 13.4 |
| Marital Status, n (%)                  |                 |                 |                 |                 |                 |
| Single                                 | 444 (43.9)      | 101 (43.7)      | 76 (52.4)       | 99 (45.0)       | 168 (40.5)      |
| De Facto                               | 38 (3.8)        | 3 (1.3)         | 2 (1.4)         | 12 (5.5)        | 21 (5.1)        |
| Married                                | 253 (25.0)      | 73 (31.6)       | 30 (20.7)       | 50 (22.7)       | 100 (24.1)      |
| Separated                              | 59 (5.8)        | 13 (5.6)        | 10 (6.9)        | 12 (5.5)        | 24 (5.8)        |
| Divorced                               | 133 (13.2)      | 14 (6.1)        | 20 (13.8)       | 35 (15.9)       | 64 (15.4)       |
| Widowed                                | 30 (3.0)        | 16 (6.9)        | 1 (0.7)         | 3 (1.4)         | 10 (2.4)        |
| Unknown                                | 54 (5.3)        | 11 (4.8)        | 6 (4.1)         | 9 (4.1)         | 28 (6.8)        |
| Country of Birth, n (%)                |                 |                 |                 |                 |                 |
| Australia (and external territories)   | 654 (64.7)      | 162 (70.1)      | 98 (67.6)       | 120 (54.6)      | 274 (66.0)      |
| New Zealand                            | 31 (3.1)        | 9 (3.9)         | 5 (3.5)         | 5 (2.3)         | 12 (2.9)        |
| Maritime South-East Asia               | 27 (2.7)        | 3 (1.3)         | 1 (0.7)         | 6 (2.7)         | 17 (4.1)        |
| Mainland South-East Asia               | 13 (1.3)        | 3 (1.3)         | 2 (1.4)         | 2 (0.9)         | 6 (1.5)         |
| Southern Asia                          | 11 (1.1)        | -               | -               | 3 (1.4)         | 8 (1.9)         |
| Chinese Asia                           | 9 (0.9)         | 2 (0.9)         | -               | 2 (0.9)         | 5 (1.2)         |
| Southern and East Africa               | 18 (1.8)        | -               | 2 (1.4)         | 3 (1.4)         | 13 (3.1)        |
| The United Kingdom                     | 84 (8.3)        | 28 (12.1)       | 12 (8.3)        | 14 (6.4)        | 30 (7.2)        |
| Western Europe                         | 11 (1.1)        | 2 (0.9)         | 1 (0.7)         | 4 (1.8)         | 4 (1.0)         |
| Southern Europe                        | 11 (1.1)        | 2 (0.9)         | -               | 3 (1.4)         | 6 (1.5)         |
| Other                                  | 44 (4.4)        | 7 (3.0)         | 4 (2.8)         | 9 (4.1)         | 24 (5.8)        |
| Unknown                                | 98 (9.7)        | 13 (5.6)        | 20 (13.8)       | 49 (22.3)       | 16 (3.9)        |
| Usual Occupation, n (%)                |                 |                 |                 |                 |                 |
| Managers                               | 26 (2.6)        | 1 (0.4)         | 4 (2.8)         | 9 (4.1)         | 12 (3.0)        |
| Professionals                          | 49 (4.9)        | 5 (2.2)         | 3 (2.1)         | 11 (5.0)        | 30 (7.2)        |
| Technicians and Trades Workers         | 80 (7.9)        | 3 (1.3)         | 9 (6.2)         | 24 (10.9)       | 44 (10.6)       |
| Community and Personal Service Workers | 34 (3.4)        | 2 (0.9)         | 6 (4.1)         | 8 (3.6)         | 18 (4.3)        |
| Clerical or Administrative Workers     | 20 (2.0)        | 1 (0.4)         | 2 (1.4)         | 5 (2.3)         | 12 (2.9)        |
| Sales Workers                          | 10 (1.0)        | -               | 1 (0.7)         | -               | 9 (2.2)         |

## Cohort Profile: ABI-REStART, 1991-2020

19

|                                                      |            |            |            |            |             |
|------------------------------------------------------|------------|------------|------------|------------|-------------|
| Machinery Operators and Drivers                      | 31 (3.1)   | 4 (1.7)    | 2 (1.4)    | 10 (4.6)   | 15 (3.6)    |
| Labourers                                            | 48 (4.8)   | 5 (2.2)    | 6 (4.1)    | 12 (5.5)   | 25 (6.0)    |
| Not in workforce                                     | 206 (20.4) | 7 (3.0)    | 15 (10.3)  | 42 (19.1)  | 142 (34.22) |
| Unknown                                              | 507 (50.2) | 203 (87.9) | 97 (66.9)  | 99 (45.0)  | 108 (26.0)  |
| Accommodation Type, n (%)                            |            |            |            |            |             |
| Private Residence                                    | 318 (31.5) | 7 (3.0)    | 31 (21.4)  | 74 (33.6)  | 206 (49.6)  |
| Public Rental                                        | 56 (5.5)   | 4 (1.7)    | 1 (0.7)    | 20 (9.1)   | 31 (7.5)    |
| Family Home                                          | 40 (4.0)   | 3 (1.3)    | 11 (7.6)   | 1 (0.5)    | 11 (2.7)    |
| Supported Accommodation                              | 19 (1.9)   | -          | -          | 1 (0.5)    | 18 (4.3)    |
| Residential Aged Care                                | 9 (0.7)    | -          | -          | 1 (0.5)    | 6 (1.5)     |
| Temporary Housing                                    | 15 (1.5)   | -          | -          | 1 (0.5)    | 14 (3.4)    |
| Crisis Accommodation                                 | 5 (0.5)    | -          | -          | 1 (0.5)    | 4 (1.0)     |
| Hospital                                             | 3 (0.3)    | -          | -          | -          | 3 (0.7)     |
| Institutional care                                   | 2 (0.2)    | -          | -          | -          | 2 (0.5)     |
| No fixed address                                     | 20 (2.0)   | -          | 3 (2.1)    | 6 (2.7)    | 11 (2.7)    |
| Unknown                                              | 526 (52.0) | 217 (94.9) | 99 (68.3)  | 101 (45.9) | 109 (26.3)  |
| ASGS – Remoteness Area, n (%)                        |            |            |            |            |             |
| Major city                                           | 814 (84.3) | 179 (77.5) | 113 (77.9) | 167 (75.9) | 355 (85.5)  |
| Inner regional                                       | 57 (5.9)   | 12 (5.2)   | 10 (6.9)   | 19 (8.6)   | 16 (3.9)    |
| Outer regional                                       | 45 (4.7)   | 16 (6.9)   | 13 (9.0)   | 9 (4.1)    | 7 (1.7)     |
| Remote                                               | 28 (2.9)   | 6 (2.6)    | 1 (0.7)    | 11 (5.0)   | 10 (2.4)    |
| Very Remote                                          | 14 (1.5)   | 7 (3.0)    | 1 (0.7)    | 1 (0.5)    | 5 (1.2)     |
| Migratory & Offshore                                 | 8 (0.8)    | 6 (2.6)    | 2 (1.4)    | 0          | 0           |
| Missing                                              | 45 (4.5)   | 5 (2.2)    | 5 (3.5)    | 13 (5.9)   | 22 (5.3)    |
| SEIFA – Index of Relative Social Disadvantage, n (%) |            |            |            |            |             |
| Q1 – Most disadvantaged                              | 141 (14.0) | 61 (26.4)  | 37 (25.5)  | 18 (8.2)   | 25 (6.0)    |
| Q2 – More disadvantaged                              | 83 (8.2)   | 6 (2.6)    | 10 (6.9)   | 25 (11.4)  | 42 (10.1)   |
| Q3 – Average                                         | 216 (21.4) | 22 (9.5)   | 19 (13.1)  | 68 (30.9)  | 107 (25.8)  |
| Q4 – Less disadvantaged                              | 291 (28.8) | 68 (29.4)  | 41 (28.3)  | 53 (24.1)  | 129 (31.1)  |
| Q5 – Least disadvantaged                             | 224 (22.2) | 63 (27.3)  | 28 (19.3)  | 43 (19.6)  | 90 (21.7)   |
| Missing                                              | 56 (5.5)   | 11 (4.8)   | 10 (6.9)   | 13 (5.9)   | 22 (5.3)    |

Note. ASGS = Australian Statistical Geography Standard; SEIFA = Socio-Economic Index for Areas.

311  
312

313 **Brain Injury Characteristics**

314 Table 6 summarizes brain injury characteristics for the cohort. There were significant  
 315 differences in gender composition of the diagnostic groups ( $p < 0.001$ ), with more male than  
 316 female clients with TBI and stroke. Gender differences were smaller in the other NTBI and  
 317 neurologic groups.

318 **Table 6. Brain injury and admission characteristics for the ABI-REStART cohort at**  
 319 **index admission to community-based brain injury services, 1991-2020 (n=1,011)**

| Characteristics                                       | Total,<br>n = 1,011       | Traumatic,<br>n=353        | Non-traumatic             |                           | Neurologic,<br>N=103     |
|-------------------------------------------------------|---------------------------|----------------------------|---------------------------|---------------------------|--------------------------|
|                                                       |                           |                            | Stroke,<br>n=292          | Other NTBI,<br>n=263      |                          |
| <b><i>Sociodemographic</i></b>                        |                           |                            |                           |                           |                          |
| Age at injury, mean $\pm$ SD (years)                  | 42.3 $\pm$ 16.5,<br>n=853 | 33.4 $\pm$ 14.9,<br>n= 303 | 51.0 $\pm$ 13.4,<br>n=265 | 43.0 $\pm$ 15.0,<br>n=226 | 46.8 $\pm$ 18.9,<br>n=59 |
| Gender, n (%)                                         |                           |                            |                           |                           |                          |
| Male                                                  | 682 (67.5)                | 283 (80.2)                 | 197 (67.5)                | 142 (54.0)                | 60 (58.3)                |
| Female                                                | 329 (32.5)                | 70 (19.8)                  | 95 (32.5)                 | 121 (46.0)                | 43 (41.8)                |
| Indigenous, n (%)                                     |                           |                            |                           |                           |                          |
| Total                                                 | 34 (3.4)                  | 16 (4.5)                   | 10 (3.4)                  | 5 (1.9)                   | 3 (2.9)                  |
| Male                                                  | 24 (3.5)                  | 13 (4.6)                   | 8 (4.1)                   | 2 (1.4)                   | 1 (1.7)                  |
| Female                                                | 10 (3.0)                  | 3 (4.3)                    | 2 (2.1)                   | 3 (2.5)                   | 2 (4.7)                  |
| <b><i>Clinical</i></b>                                |                           |                            |                           |                           |                          |
| Injury location, n (%)                                |                           |                            |                           |                           |                          |
| Right                                                 | 114 (11.3)                | 24 (6.8)                   | 76 (26.0)                 | 13 (4.9)                  | 1 (1.0)                  |
| Left                                                  | 145 (14.3)                | 38 (10.8)                  | 97 (33.2)                 | 10 (3.8)                  | -                        |
| Unilateral – side unspecified                         | 101 (10.0)                | 42 (11.9)                  | 40 (13.7)                 | 19 (7.2)                  | -                        |
| Bilateral                                             | 595 (58.9)                | 220 (62.3)                 | 64 (21.9)                 | 211 (80.2)                | 100 (97.1)               |
| Unknown                                               | 56 (5.5)                  | 29 (8.2)                   | 15 (5.1)                  | 10 (3.8)                  | 2 (1.9)                  |
| Length of acute hospital stay, mean $\pm$ SD (months) | 6.0 $\pm$ 4.8,<br>n=740   | 7.0 $\pm$ 5.3,<br>n=273    | 5.1 $\pm$ 3.5,<br>n=236   | 5.9 $\pm$ 4.9,<br>n= 206  | 4.8 $\pm$ 6.7,<br>n= 25  |
| Previous ABI, n (%)                                   | 76 (7.5)                  | 15 (4.3)                   | 41 (14.0)                 | 19 (7.2)                  | 1 (1.0)                  |
| Injury phase, n (%)                                   |                           |                            |                           |                           |                          |
| Acute (>3 months)                                     | 56 (6.0)                  | 12 (3.5)                   | 21 (7.5)                  | 20 (8.3)                  | 3 (4.1)                  |
| Subacute (3 – 12 months)                              | 410 (43.7)                | 134 (39.2)                 | 158 (56.2)                | 109 (45.0)                | 9 (12.3)                 |
| Chronic (> 12 months)                                 | 472 (50.3)                | 196 (57.3)                 | 102 (36.3)                | 113 (46.7)                | 61 (83.6)                |
| <b><i>Admission</i></b>                               |                           |                            |                           |                           |                          |
| Age at admission, mean $\pm$ SD (years)               | 45.4 $\pm$ 15.5           | 37.8 $\pm$ 14.5            | 52.6 $\pm$ 13.2           | 45.4 $\pm$ 14.5           | 50.9 $\pm$ 15.8          |
| Time post-injury, n (%)                               |                           |                            |                           |                           |                          |
| < 1 year                                              | 466 (49.7)                | 146 (42.7)                 | 179 (63.7)                | 129 (53.3)                | 12 (16.4)                |
| 1 – 2 years                                           | 161 (17.2)                | 68 (19.9)                  | 48 (17.1)                 | 40 (16.5)                 | 5 (6.9)                  |
| > 2 years                                             | 311 (31.1)                | 128 (37.4)                 | 54 (19.2)                 | 73 (30.2)                 | 56 (76.7)                |
| Program, n (%)                                        |                           |                            |                           |                           |                          |
| TRP                                                   | 546 (54.0)                | 232 (65.7)                 | 168 (57.5)                | 140 (53.2)                | 17 (16.5)                |
| TAP                                                   | 121 (12.0)                | 36 (10.2)                  | 28 (9.6)                  | 41 (15.6)                 | 16 (15.5)                |
| CAPB                                                  | 107 (10.6)                | 32 (9.1)                   | 24 (8.2)                  | 30 (11.4)                 | 21 (20.4)                |
| HACC Social Support                                   | 70 (6.9)                  | 25 (7.1)                   | 26 (8.9)                  | 14 (5.3)                  | 5 (4.9)                  |

|                      |            |            |            |            |           |
|----------------------|------------|------------|------------|------------|-----------|
| SIL                  | 167 (16.5) | 39 (11.1)  | 46 (15.8)  | 38 (14.5)  | 44 (42.3) |
| Admitted from, n (%) |            |            |            |            |           |
| Home                 | 435 (43.0) | 165 (46.7) | 120 (41.1) | 96 (36.5)  | 54 (52.4) |
| Hospital             | 437 (43.2) | 139 (39.4) | 140 (48.0) | 136 (51.7) | 22 (21.4) |
| Other                | 22 (2.2)   | 8 (2.3)    | 5 (1.7)    | 9 (3.4)    | -         |
| Unknown              | 117 (11.6) | 41 (11.6)  | 27 (9.3)   | 22 (8.4)   | 27 (26.2) |

Note. TRP = Transitional Rehabilitation Program; TAP = Transitional Accommodation Program; CAPB = Capacity Building; HACC = Home and Community Care; SIL = Supported Independent Living

320

321 Significant differences in age at admission and ABI type ( $p < .001$ ) were also present.

322 Clients with TBI were significantly younger than those in all other ABI groups at admission

323 (largest corrected  $p < 0.001$ ), which is consistent with prior literature. Those presenting with

324 stroke and neurological conditions were significantly older than those with other NTBI

325 (largest corrected  $p < .006$ ), likely reflecting increasing age-related stroke risk<sup>42,43</sup>.

### 326 *Clinical Characteristics*

327 Clients with neurologic conditions or TBI primarily entered post-acute rehabilitation

328 in the chronic injury phase, whereas most clients with stroke entered services during the sub-

329 acute phase. This may be related to longer hospital admissions for TBI clients, but may also

330 demonstrate the benefits of specialized stroke services in managing acute stroke<sup>44</sup>, quickly

331 directing people to rehabilitation. Bilateral injuries (58.9%) were the most common overall,

332 and for TBI (62.3%), other NTBI (80.2%) and neurologic condition groups (97.1%). The

333 majority of strokes were unilateral (72.9%), with left hemispheric more common than right

334 hemispheric stroke. Seventy-six clients had another brain injury prior to their admission

335 injury (7.5%). Individuals with a stroke diagnosis represented 54.0% of those clients (41 of

336 76). The presence of these individuals with prior injuries is consistent with evidence that

337 recurrent TBI is associated with increased disability<sup>45</sup>, and prior stroke is a significant risk

338 factor of recurrent stroke<sup>46</sup>.

339 The median length of acute hospital stay for the cohort was 5.0 months (IQR 2.8mo-

340 8.0mo), with TBI clients having significantly longer acute stays (largest corrected  $p < 0.001$ ).

341 Although it is not clear why this was the case, evidence suggests that accompanying injuries

1  
2  
3 342 and complications are associated with longer hospital stays for patients with TBI<sup>47</sup>. However,  
4  
5 343 rehabilitation appears to be effective in improving independence despite longer periods  
6  
7 344 between injury and rehabilitation admission<sup>48</sup>.  
8  
9

### 10 345 ***Cause of Injury***

11 346 External causes of injury – defined as environmental events, circumstances or  
12  
13 347 conditions that are external to the body – are shown in Table 7. Internal causes (e.g. medical  
14  
15 348 conditions) are not included. Half of the cohort sustained their ABI due to an external cause  
16  
17 349 (50.6%, 512 of 1,011). Accidents were the leading external cause of injury (60.2%; 308 of  
18  
19 350 512), with motor vehicle accidents (MVA; 33.6%) the most common accident type. Clients  
20  
21 351 aged below 30 were most likely to have sustained an ABI due to motor vehicle accidents (77  
22  
23 352 of 172, 44.8%), with a median age of 23.7 years (IQR 19.1y-37.7y), whereas clients aged  
24  
25 353 from 40-60 were most likely to have been injured in accidental falls (35 of 61, 57.4%),  
26  
27 354 corrected  $p < 0.001$ . Abnormal reaction during surgical or medical procedure was the leading  
28  
29 355 external cause of stroke (82.4%), while poisoning and toxic effect of substances was the  
30  
31 356 leading external cause of other NTBI (48.6%).  
32  
33  
34  
35  
36  
37  
38  
39  
40  
41  
42  
43  
44  
45  
46  
47  
48  
49  
50  
51  
52  
53  
54  
55  
56  
57  
58  
59  
60

**Table 7. Known external causes of brain injury for the ABI-REStART cohort (n=1,011)**

| Cause of ABI, n (%)                                                                    | Total,<br>n=1,011 | Traumatic,<br>n = 353 | Non-traumatic    |                      | Neurologic,<br>n=103 |
|----------------------------------------------------------------------------------------|-------------------|-----------------------|------------------|----------------------|----------------------|
|                                                                                        |                   |                       | Stroke,<br>n=292 | Other NTBI,<br>n=263 |                      |
| <i>Individuals with known external causes of injury</i>                                | 512 (50.6)        | 347 (98.3)            | 51 (17.5)        | 111 (42.2)           | 4 (3.9)              |
| Accidents                                                                              |                   |                       |                  |                      |                      |
| Accidental fall                                                                        | 61 (11.9)         | 58 (16.7)             | 1 (2.0)          | 2 (1.8)              | -                    |
| Motor vehicle accident (incl. pedestrian)                                              | 172 (33.6)        | 167 (48.1)            | -                | 4 (3.6)              | 1 (33.3)             |
| Motorbike accident                                                                     | 29 (5.7)          | 29 (8.4)              | -                | -                    | -                    |
| Cycling accident                                                                       | 14 (2.7)          | 13 (3.8)              | -                | 1 (0.9)              | -                    |
| Quad bike accident                                                                     | 4 (0.8)           | 4 (1.2)               | -                | -                    | -                    |
| Railway accident                                                                       | 3 (0.6)           | 3 (0.9)               | -                | -                    | -                    |
| Drowning and submersion                                                                | 3 (0.6)           | 1 (0.3)               | -                | 2 (1.8)              | -                    |
| Other accident                                                                         | 12 (2.3)          | 9 (2.6)               | 1 (2.0)          | 2 (1.8)              | -                    |
| Unspecified accident                                                                   | 10 (1.9)          | 8 (2.3)               | -                | 2 (1.8)              | -                    |
| Poisoning and toxic effect of drugs, medicaments, or gases                             |                   |                       |                  |                      |                      |
| Accidental overdose                                                                    | 12 (2.3)          | -                     | 1 (2.0)          | 11 (9.9)             | -                    |
| Intentional overdose                                                                   | 19 (3.7)          | -                     | 1 (2.0)          | 18 (16.2)            | -                    |
| Unknown intent                                                                         | 9 (1.8)           | -                     | -                | 9 (8.1)              | -                    |
| Complication of chronic substance use                                                  | 20 (3.9)          | -                     | 3 (3.9)          | 16 (14.4)            | 1 (33.3)             |
| Intentional self-harm (excl. poisoning)                                                |                   |                       |                  |                      |                      |
| Hanging or strangulation                                                               | 4 (0.8)           | -                     | -                | 4 (3.6)              | -                    |
| Jumping from high place, or in front of moving object                                  | 7 (1.4)           | 7 (2.0)               | -                | -                    | -                    |
| Drowning                                                                               | 1 (0.2)           | -                     | -                | 1 (0.9)              | -                    |
| Unspecified suicide                                                                    | 2 (0.4)           | 1 (0.3)               | -                | 1 (0.9)              | -                    |
| Complications of medical and surgical care                                             |                   |                       |                  |                      |                      |
| Abnormal reaction during surgical or medical procedure                                 | 78 (15.2)         | 2 (0.6)               | 42 (82.4)        | 33 (29.7)            | 1 (33.3)             |
| Adverse effects of drugs, medicaments and biological substances during therapeutic use | 2 (0.4)           | -                     | 1 (2.0)          | 1 (0.9)              | -                    |
| Assault                                                                                | 50 (9.8)          | 45 (13.0)             | 1 (2.0)          | 4 (3.6)              | -                    |
| <i>Individuals with known internal or unknown causes</i>                               | 499 (49.4)        | 6 (1.7)               | 241 (82.5)       | 152 (57.8)           | 99 (96.1)            |

Note. Percentages for each group were calculated using the number of individuals with known external causes of injury recorded as the denominator.

Individuals with known internal or unknown causes were not included in the count.

## Cohort Profile: ABI-REStART, 1991-2020

**Admission Characteristics**

The majority of TBI (65.4%), stroke (63.7%) and other NTBI (54.8%) clients were admitted for post-acute transitional rehabilitation. The majority of neurologic clients were admitted to Supported Independent Living (43.7%).

Median time from injury to admission to community-based services was 10.5 months (IQR 5.7mo-27.1mo). Clients with neurologic conditions took significantly longer to access services than other ABI groups (largest corrected  $p < 0.001$ ). Those in the stroke group accessed services significantly faster than the TBI group ( $p < 0.001$ ) but did not differ from the other NTBI group ( $p = 0.40$ ).

Similar numbers of clients were admitted from hospital and home. There were significant differences in ABI group and admission source ( $p = 0.001$ ), with 71.1% of individuals with neurologic conditions admitted from home, 52.9% of the TBI group, 45.3% of the stroke group, and 39.8% of the other NTBI group. The overrepresentation of individuals with neurological injury in admissions from home is likely the result of slow onset of neurological injuries relative to acute injuries like stroke or TBI.

**Future Directions**

The main focus of the ABI-REStART research program is to measure the short- and long-term outcomes of cohort members following discharge from post-acute services. The heterogeneity of the cohort, and the scope and quantity of longitudinal health data available provides a unique opportunity to identify the predictors of outcomes. Findings will enable greater understanding of personal and structural factors influencing outcomes, providing valuable evidence for clinicians to generate effective, personalized post-acute programs.

To ensure that change over time can be examined into the future, the cohort will be periodically updated with new admissions to allow a dynamic cohort of individuals to be followed through changing services over time, a possibility not seen in previous cohorts of this type.

Health comorbidities of the cohort will also be examined to understand the complex needs of people with ABI and facilitate effective person-centred care. Comorbidities—i.e. chronic condition(s) co-existing



## Cohort Profile: ABI-REStART, 1991-2020

25

with an index disease<sup>49</sup>—are common following ABI. Complex or mismanaged comorbidity can affect the course and outcome of rehabilitation and result in poorer functional outcomes, longer stay, and higher use and costs of healthcare services<sup>50–52</sup>. Better understanding of comorbidities can support a focus on the whole person, not only neurologic recovery, which is critical for effective community re-integration.

Mental health disorders are common for those with ABI<sup>52,53</sup>. Individuals with mental health comorbidities present before or after ABI have poorer outcomes than those without<sup>52,54</sup>. Prior research using a retrospective convenience sample of 263 ABI-REStART members admitted to the service from 2009 - 2018 found that mental health comorbidities were present in 55.8% of the sample ( $n=106$ ), representing the most common comorbidity<sup>55</sup>. ABI-REStART provides the opportunity to examine the prevalence of mental illness, specific mental health needs, and its impact on rehabilitation outcomes to inform policy and services for mental health and ABI.

### Strengths and Limitations

ABI-REStART is the largest post-acute community-based ABI cohort in Australia. The research design provides novel opportunities to examine the longitudinal needs of people living with ABI, and to evaluate the efficacy of post-acute rehabilitation and support programs offered. The demographic and outcomes data at Brightwater has been collected over 29 years, which will allow the effects of policy and treatment changes over time to be examined. The use of both internal clinical data and linked health data produces a detailed picture of brain injury that is more complex than could be derived from a single source, allowing complex questions around the nature of ABI and the individualized client requirements to be examined.

As ABI-REStART is comprised of individuals from a single organization, this population differs from the ABI population in Western Australia in some ways. The cohort is relatively young, with only 6.2% of clients aged 65 years or above. This underrepresentation reduces the conclusions that can be drawn from this cohort around older adults. Similarly, only 3.4% of the cohort were of Aboriginal or Torres Strait

## Cohort Profile: ABI-REStART, 1991-2020

26

1  
2  
3  
4  
5  
6  
7  
8  
9  
10  
11  
12  
13  
14  
15  
16  
17  
18  
19  
20  
21  
22  
23  
24  
25  
26  
27  
28  
29  
30  
31  
32  
33  
34  
35  
36  
37  
38  
39  
40  
41  
42  
43  
44  
45  
46  
47  
48  
49  
50  
51  
52  
53  
54  
55  
56  
57  
58  
59  
60  
61

Islander background despite Indigenous Australians being overrepresented in TBI cases in Western Australia<sup>2,56</sup> and having elevated stroke risk relative to non-Indigenous Australians<sup>57,58</sup>. Research is needed to examine the factors impacting the engagement of Indigenous Australians with post-acute services. Finally, the use of a State-based data linkage register has limitations, as pre-admission or post-discharge follow-up data for cohort members based interstate or overseas will not be captured in the WA Data Linkage System data collections, and it is not possible to distinguish these cases from individuals who remained in WA but did not access services captured by data linkage systems.

### Collaboration

41  
42  
43  
44  
45  
46  
47  
48  
49  
50  
51  
52  
53  
54  
55  
56  
57  
58  
59  
60  
61  
62  
63  
64  
65  
66  
67  
68  
69  
70  
71  
72  
73  
74  
75  
76  
77  
78  
79  
80  
81  
82  
83  
84  
85  
86  
87  
88  
89  
90  
91  
92  
93  
94  
95  
96  
97  
98  
99  
100  
101  
102  
103  
104  
105  
106  
107  
108  
109  
110  
111  
112  
113  
114  
115  
116  
117  
118  
119  
120  
121  
122  
123  
124  
125  
126  
127  
128  
129  
130  
131  
132  
133  
134  
135  
136  
137  
138  
139  
140  
141  
142  
143  
144  
145  
146  
147  
148  
149  
150  
151  
152  
153  
154  
155  
156  
157  
158  
159  
160  
161  
162  
163  
164  
165  
166  
167  
168  
169  
170  
171  
172  
173  
174  
175  
176  
177  
178  
179  
180  
181  
182  
183  
184  
185  
186  
187  
188  
189  
190  
191  
192  
193  
194  
195  
196  
197  
198  
199  
200  
201  
202  
203  
204  
205  
206  
207  
208  
209  
210  
211  
212  
213  
214  
215  
216  
217  
218  
219  
220  
221  
222  
223  
224  
225  
226  
227  
228  
229  
230  
231  
232  
233  
234  
235  
236  
237  
238  
239  
240  
241  
242  
243  
244  
245  
246  
247  
248  
249  
250  
251  
252  
253  
254  
255  
256  
257  
258  
259  
260  
261  
262  
263  
264  
265  
266  
267  
268  
269  
270  
271  
272  
273  
274  
275  
276  
277  
278  
279  
280  
281  
282  
283  
284  
285  
286  
287  
288  
289  
290  
291  
292  
293  
294  
295  
296  
297  
298  
299  
300  
301  
302  
303  
304  
305  
306  
307  
308  
309  
310  
311  
312  
313  
314  
315  
316  
317  
318  
319  
320  
321  
322  
323  
324  
325  
326  
327  
328  
329  
330  
331  
332  
333  
334  
335  
336  
337  
338  
339  
340  
341  
342  
343  
344  
345  
346  
347  
348  
349  
350  
351  
352  
353  
354  
355  
356  
357  
358  
359  
360  
361  
362  
363  
364  
365  
366  
367  
368  
369  
370  
371  
372  
373  
374  
375  
376  
377  
378  
379  
380  
381  
382  
383  
384  
385  
386  
387  
388  
389  
390  
391  
392  
393  
394  
395  
396  
397  
398  
399  
400  
401  
402  
403  
404  
405  
406  
407  
408  
409  
410  
411  
412  
413  
414  
415  
416  
417  
418  
419  
420  
421  
422  
423  
424  
425  
426  
427  
428  
429  
430  
431  
432  
433  
434  
435  
436  
437  
438  
439  
440  
441  
442  
443  
444  
445  
446  
447  
448  
449  
450  
451  
452  
453  
454  
455  
456  
457  
458  
459  
460  
461  
462  
463  
464  
465  
466  
467  
468  
469  
470  
471  
472  
473  
474  
475  
476  
477  
478  
479  
480  
481  
482  
483  
484  
485  
486  
487  
488  
489  
490  
491  
492  
493  
494  
495  
496  
497  
498  
499  
500  
501  
502  
503  
504  
505  
506  
507  
508  
509  
510  
511  
512  
513  
514  
515  
516  
517  
518  
519  
520  
521  
522  
523  
524  
525  
526  
527  
528  
529  
530  
531  
532  
533  
534  
535  
536  
537  
538  
539  
540  
541  
542  
543  
544  
545  
546  
547  
548  
549  
550  
551  
552  
553  
554  
555  
556  
557  
558  
559  
560  
561  
562  
563  
564  
565  
566  
567  
568  
569  
570  
571  
572  
573  
574  
575  
576  
577  
578  
579  
580  
581  
582  
583  
584  
585  
586  
587  
588  
589  
590  
591  
592  
593  
594  
595  
596  
597  
598  
599  
600  
601  
602  
603  
604  
605  
606  
607  
608  
609  
610  
611  
612  
613  
614  
615  
616  
617  
618  
619  
620  
621  
622  
623  
624  
625  
626  
627  
628  
629  
630  
631  
632  
633  
634  
635  
636  
637  
638  
639  
640  
641  
642  
643  
644  
645  
646  
647  
648  
649  
650  
651  
652  
653  
654  
655  
656  
657  
658  
659  
660  
661  
662  
663  
664  
665  
666  
667  
668  
669  
670  
671  
672  
673  
674  
675  
676  
677  
678  
679  
680  
681  
682  
683  
684  
685  
686  
687  
688  
689  
690  
691  
692  
693  
694  
695  
696  
697  
698  
699  
700  
701  
702  
703  
704  
705  
706  
707  
708  
709  
710  
711  
712  
713  
714  
715  
716  
717  
718  
719  
720  
721  
722  
723  
724  
725  
726  
727  
728  
729  
730  
731  
732  
733  
734  
735  
736  
737  
738  
739  
740  
741  
742  
743  
744  
745  
746  
747  
748  
749  
750  
751  
752  
753  
754  
755  
756  
757  
758  
759  
760  
761  
762  
763  
764  
765  
766  
767  
768  
769  
770  
771  
772  
773  
774  
775  
776  
777  
778  
779  
780  
781  
782  
783  
784  
785  
786  
787  
788  
789  
790  
791  
792  
793  
794  
795  
796  
797  
798  
799  
800  
801  
802  
803  
804  
805  
806  
807  
808  
809  
810  
811  
812  
813  
814  
815  
816  
817  
818  
819  
820  
821  
822  
823  
824  
825  
826  
827  
828  
829  
830  
831  
832  
833  
834  
835  
836  
837  
838  
839  
840  
841  
842  
843  
844  
845  
846  
847  
848  
849  
850  
851  
852  
853  
854  
855  
856  
857  
858  
859  
860  
861  
862  
863  
864  
865  
866  
867  
868  
869  
870  
871  
872  
873  
874  
875  
876  
877  
878  
879  
880  
881  
882  
883  
884  
885  
886  
887  
888  
889  
890  
891  
892  
893  
894  
895  
896  
897  
898  
899  
900  
901  
902  
903  
904  
905  
906  
907  
908  
909  
910  
911  
912  
913  
914  
915  
916  
917  
918  
919  
920  
921  
922  
923  
924  
925  
926  
927  
928  
929  
930  
931  
932  
933  
934  
935  
936  
937  
938  
939  
940  
941  
942  
943  
944  
945  
946  
947  
948  
949  
950  
951  
952  
953  
954  
955  
956  
957  
958  
959  
960  
961  
962  
963  
964  
965  
966  
967  
968  
969  
970  
971  
972  
973  
974  
975  
976  
977  
978  
979  
980  
981  
982  
983  
984  
985  
986  
987  
988  
989  
990  
991  
992  
993  
994  
995  
996  
997  
998  
999  
1000

Researchers interested in collaborating on cohort analyses should contact the corresponding author to express their interest. Initial planned data analyses and publications will be conducted by the primary ABI-REStART study investigators; however the research team is open to potential collaboration on future analyses. Access to the data is only possible with express permission of the University of Western Australia and West Australian Department of Health Human Research Ethics Committees and data custodians, and may require a data sharing agreement. Analysis of linked data is currently authorised to occur at only one location in Perth, Western Australia, owing to ethical considerations.

### Funding declaration

This research received no specific grant from any funding agency in the public, commercial or not-for-profit sectors.

### Competing interests

None declared.

### Acknowledgements

The authors gratefully acknowledge all the clients and families at Brightwater Care Group who participated in this study and all the staff who contributed to the data collection.

Cohort Profile: ABI-REStART, 1991-2020

27

### Author Contribution

**GM** performed the data collection, wrote the statistical analysis plan, analysed the data and drafted and revised the paper. **LT** designed and supervised the study, provided analytical input, and drafted and revised the paper. **JW** provided clinical and service input, and revised the draft paper. **AM** designed and led the study, obtained linked data and revised the draft paper.

### Data sharing statement

Data may be made available upon reasonable request. Access to the data is only possible with express permission of the WA Department of Health Human Research Ethics Committees and data custodians, and may require a data sharing agreement. Analysis of linked data is currently authorised to occur at only one location in Perth, Western Australia, owing to ethical considerations.

Cohort Profile: ABI-REStART, 1991-2020

**Figure 1. Data Sources and Study Design for the ABI-REStART Study, 1991-2020. (a) Internal and External Data Sources and, (b) Study Design**

For peer review only

## References

1. Rushworth N. *Brain Injury Australia: Submission to the Australian Government's National Mental Health and Disability Employment Strategy.*; 2008. <https://www.braininjuryaustralia.org.au/wp-content/uploads//braininjuryaustraliasubmissionemploymentstrategyfinal.pdf>
2. Fortune N, Wen X. *The Definition, Incidence and Prevalence of Acquired Brain Injury in Australia.* Australian Institute of Health and Welfare; 1999.
3. Brain Injury Australia. About brain injury. Published 2016. <https://www.braininjuryaustralia.org.au/>
4. Fleminger S, Ponsford J. Long term outcome after traumatic brain injury. *Br Med J.* 2005;331(7530):1419-1420. doi:10.1136/bmj.331.7530.1419
5. The Victorian Neurotrauma Initiative. *The Economic Cost of Spinal Cord Injury and Traumatic Brain Injury in Australia Report by Access Economics Pty Limited for The Victorian Neurotrauma Initiative.*; 2009. <http://www.spinalcure.org.au/pdf/Economic-cost-of-SCI-and-TBI-in-Au-2009.pdf>
6. van Velzen JM, van Bennekom CAM, Edelaar MJA, Sluiter JK, Frings-Dresen MHW. How many people return to work after acquired brain injury?: A systematic review. *Brain Inj.* 2009;23(6):473-488. doi:10.1080/02699050902970737
7. McCabe P, Lippert C, Weiser M, Hilditch M, Hartridge C, Villamere J. Community reintegration following acquired brain injury. *Brain Inj.* 2007;21(2):231-257. doi:10.1080/02699050701201631
8. Wise EK, Mathews-Dalton C, Dikmen S, et al. Impact of traumatic brain injury on participation in leisure activities. *Arch Phys Med Rehabil.* 2010;91(9):1357-1362. doi:10.1016/j.apmr.2010.06.009
9. Ownsworth T, Fleming J, Haines T, et al. Development of depressive symptoms during early community reintegration after traumatic brain injury. *J Int Neuropsychol Soc.* 2011;17(1):112-119. doi:10.1017/S1355617710001311
10. Turner BJ, Fleming JM, Ownsworth TL, Cornwell PL. The transition from hospital to home for individuals with acquired brain injury: A literature review and research recommendations. *Disabil Rehabil.* 2008;30(16):1153-1176. doi:10.1080/09638280701532854

## Cohort Profile: ABI-REStART, 1991-2020

30

11. Malec JF, Basford JS. Postacute brain injury rehabilitation. *Arch Phys Med Rehabil*. 1996;77(2):198-207. doi:10.1016/S0003-9993(96)90168-9
12. Marquez de la Plata C. Timeliness of postacute brain injury rehabilitation after TBI improves outcome. *Chall*. 2015;9(2):10-12.
13. Curran C, Dorstyn D, Polychronis C, Denson L. Functional outcomes of community-based brain injury rehabilitation clients. *Brain Inj*. 2015;29(1):25-32. doi:10.3109/02699052.2014.948067
14. Borg DN, Nielsen M, Kennedy A, et al. The effect of access to a designated interdisciplinary post-acute rehabilitation service on participant outcomes after brain injury. *Brain Inj*. 2020;34(10):1358-1366. doi:10.1080/02699052.2020.1802660
15. Christie L, Egan C, Wyborn J, Simpson GK. Evaluating client experience of rehabilitation following acquired brain injury: a cross-sectional study. *Brain Inj*. 2021;35(2):215-225. doi:10.1080/02699052.2020.1867768
16. Williams E, Jackson H, Wagland J, Martini A. Community Rehabilitation Outcomes for Different Stroke Diagnoses: An Observational Cohort Study. *Arch Rehabil Res Clin Transl*. 2020;2(2):100047. doi:10.1016/j.arrct.2020.100047
17. Brightwater Care Group. Brain injury rehabilitation. Published 2020. <https://brightwatergroup.com/disability/brain-injury-rehabilitation/>
18. Department of Health Government of Western Australia. Data Linkage Western Australia. Published 2020. <https://www.datalinkage-wa.org.au/>
19. Australian Rehabilitation Outcomes Centre. *AROC Impairment Coding Guidelines.*; 2013. <https://documents.uow.edu.au/content/groups/public/@web/@chsd/@aroc/documents/doc/uow125260.pdf>
20. Tsai Y-C, Liu C-J, Huang H-C, et al. A Meta-analysis of Dynamic Prevalence of Cognitive Deficits in the Acute, Subacute, and Chronic Phases After Traumatic Brain Injury. *J Neurosci Nurs*. 2021;53(2):63-68. doi:10.1097/JNN.0000000000000570

## Cohort Profile: ABI-REStART, 1991-2020

31

- 1  
2  
3  
4  
5  
6  
7  
8  
9  
10  
11  
12  
13  
14  
15  
16  
17  
18  
19  
20  
21  
22  
23  
24  
25  
26  
27  
28  
29  
30  
31  
32  
33  
34  
35  
36  
37  
38  
39  
40  
41  
42  
43  
44  
45  
46  
47  
48  
49  
50  
51  
52  
53  
54  
55  
56  
57  
58  
59  
60
21. Echlin F. Traumatic Subdural Hematoma—Acute, Subacute and Chronic. *J Neurosurg.* 1949;6(4):294-303. doi:10.3171/jns.1949.6.4.0294
22. Cicerone KD, Mott T, Azulay J, et al. A Randomized Controlled Trial of Holistic Neuropsychologic Rehabilitation After Traumatic Brain Injury. *Arch Phys Med Rehabil.* 2008;89(12):2239-2249. doi:10.1016/j.apmr.2008.06.017
23. Piccenna L, Knox L, Douglas L. *Slow Stream Rehabilitation: An Overview.*; 2016. <https://www.summerfoundation.org.au/wp-content/uploads/ssr-briefing-paper-7-june-2016-final.pdf>
24. Jackson D, Seaman K, Sharp K, Singer R, Wagland J, Turner-Stokes L. Staged residential post-acute rehabilitation for adults following acquired brain injury: A comparison of functional gains rated on the UK Functional Assessment Measure (UK FIM+FAM) and the Mayo-Portland Adaptability Inventory (MPAI-4). *Brain Inj.* 2017;31(11):1405-1413. doi:10.1080/02699052.2017.1350998
25. Giacino JT, Ashwal S, Childs N, et al. The minimally conscious state: Definition and diagnostic criteria. *Neurology.* 2002;58(3):349-353. doi:10.1212/WNL.58.3.349
26. National Disability Insurance Agency. What is the NDIS? Published 2020. <https://www.ndis.gov.au/understanding/what-ndis>
27. Brightwater Care Group. Supported Independent Living. <https://brightwatergroup.com/disability/supported-independent-living/>
28. Brightwater Care Group. Transitional support. Published 2020. <https://brightwatergroup.com/disability/transitional-support/>
29. Department of Health Government of Western Australia. Access to WA Community Care Services. Published 2019. [https://ww2.health.wa.gov.au/Articles/F\\_I/HACC-Home-and-Community-Care-Program/Access-to-WA-Community-Care-Services](https://ww2.health.wa.gov.au/Articles/F_I/HACC-Home-and-Community-Care-Program/Access-to-WA-Community-Care-Services)
30. Australian Bureau of Statistics. Socio-Economic Indexes for Areas. Published 2018. <https://www.abs.gov.au/websitedbs/censushome.nsf/home/seifa>
31. Australian Bureau of Statistics. The Australian statistical geography standard (ASGS) remoteness

## Cohort Profile: ABI-REStART, 1991-2020

32

- 1  
2  
3  
4  
5  
6  
7  
8  
9  
10  
11  
12  
13  
14  
15  
16  
17  
18  
19  
20  
21  
22  
23  
24  
25  
26  
27  
28  
29  
30  
31  
32  
33  
34  
35  
36  
37  
38  
39  
40  
41  
42  
43  
44  
45  
46  
47  
48  
49  
50  
51  
52  
53  
54  
55  
56  
57  
58  
59  
60
- structure. Published 2018.
- <https://www.abs.gov.au/websitedbs/D3310114.nsf/home/remoteness+structure>
32. Teasdale G, Jennett B. Assessment of coma and impaired consciousness. *Lancet*. 1974;304(7872):81-84. doi:10.1016/S0140-6736(74)91639-0
33. Turner-Stokes L, Nyein K, Turner-Stokes T, Gatehouse C. The UK FIM+FAM: development and evaluation. *Clin Rehabil*. 1999;13(4):277-287. doi:10.1191/026921599676896799
34. Malec J, Lezak M. MPAI-4 Manual. 2003;(April 2003):1-84.
35. Kiresuk TJ, Sherman RE. Goal attainment scaling: A general method for evaluating comprehensive community mental health programs. *Community Ment Health J*. 1968;4(6):443-453. doi:10.1007/BF01530764
36. Turner-Stokes L, Disler R, Williams H. The Rehabilitation Complexity Scale: a simple, practical tool to identify 'complex specialised' services in neurological rehabilitation. *Clin Med (Northfield Il)*. 2007;7(6):593-599. doi:10.7861/clinmedicine.7-6-593
37. Von Steinbuechel N, Petersen C, Bullinger M, the QOLIBRI Group. Assessment of health-related quality of life in persons after traumatic brain injury - Development of the Qolibri, a specific measure. *Acta Neurochir Suppl*. 2005;(93):43-49. doi:10.1007/3-211-27577-0\_6
38. Von Steinbüchel N, Wilson L, Gibbons H, et al. Quality of life after brain injury (QOLIBRI): Scale development and metric properties. *J Neurotrauma*. 2010;27(7):1167-1185. doi:10.1089/neu.2009.1076
39. Turner-Stokes L, Shaw A, Law J, Rose H. Development and initial validation of the Northwick Park Therapy Dependency Assessment. *Clin Rehabil*. 2009;23(10):922-937. doi:10.1177/0269215509337447
40. Turner-Stokes L, Tonge P, Nyein K, Hunter M, Nielsona S, Robinson I. The Northwick Park Dependency Score (NPDS): a measure of nursing dependency in rehabilitation. *Clin Rehabil*. 1998;12(4):304-318. doi:10.1191/026921598669173600



## Cohort Profile: ABI-REStART, 1991-2020

33

- 1  
2  
3  
4  
5  
46 41. StataCorp. Stata statistical software: Release 16. Published online 2019.  
6  
7  
47 42. Simons LA, McCallum J, Friedlander Y, Simons J. Risk factors for ischemic stroke: Dubbo study of  
8  
9  
48 the elderly. *Stroke*. 1998;29(7):1341-1346. doi:10.1161/01.STR.29.7.1341  
10  
11  
49 43. Kelly-Hayes M. Influence of age and health behaviors on stroke risk: Lessons from longitudinal  
12  
13  
50 studies. *J Am Geriatr Soc*. 2010;58(SUPPL. 2):325-328. doi:10.1111/j.1532-5415.2010.02915.x  
14  
15  
51 44. Langhorne P, Ramachandra S. Organised inpatient (stroke unit) care for stroke: network meta-  
16  
17  
52 analysis. *Cochrane Database Syst Rev*. Published online April 23, 2020.  
18  
19  
53 doi:10.1002/14651858.CD000197.pub4  
20  
21  
54 45. Gavett BE, Stern RA, McKee AC. Chronic Traumatic Encephalopathy: A Potential Late Effect of  
22  
23  
55 Sport-Related Concussive and Subconcussive Head Trauma. *Clin Sports Med*. 2011;30(1):179-188.  
24  
25  
56 doi:10.1016/j.csm.2010.09.007  
26  
27  
57 46. Burn J, Dennis M, Bamford J, Sandercock P, Wade D, Warlow C. Long-term risk of recurrent stroke  
28  
29  
58 after a first-ever stroke. The Oxfordshire Community Stroke Project. *Stroke*. 1994;25(2):333-337.  
30  
31  
59 doi:10.1161/01.STR.25.2.333  
32  
33  
60 47. Tardif PA, Moore L, Boutin A, et al. Hospital length of stay following admission for traumatic brain  
34  
35  
61 injury in a Canadian integrated trauma system: A retrospective multicenter cohort study. *Injury*.  
36  
37  
62 2017;48(1):94-100. doi:10.1016/j.injury.2016.10.042  
38  
39  
63 48. Williams E, Martini A, Jackson H, Wagland J, Turner-Stokes L. Time between acquired brain injury  
40  
41  
64 and admission to community-based rehabilitation: differences in cognitive and functional gains. *Brain*  
42  
43  
65 *Inj*. 2020;34(6):713-722. doi:10.1080/02699052.2020.1740943  
44  
45  
66 49. Royal Australian College of General Practitioners (RACGP). Part A: Multimorbidity. In: *RACGP*  
46  
47  
67 *Aged Care Clinical Guide (Silver Book)*. 5th ed. Royal Australian College of General Practitioners;  
48  
49  
68 2019.  
50  
51  
69 50. Giaquinto S. Comorbidity in post-stroke rehabilitation. *Eur J Neurol*. 2003;10(3):235-238.  
52  
53  
70 doi:10.1046/j.1468-1331.2003.00563.x

## Cohort Profile: ABI-REStART, 1991-2020

- 1  
2  
3  
4  
5  
6  
7  
8  
9  
10  
11  
12  
13  
14  
15  
16  
17  
18  
19  
20  
21  
22  
23  
24  
25  
26  
27  
28  
29  
30  
31  
32  
33  
34  
35  
36  
37  
38  
39  
40  
41  
42  
43  
44  
45  
46  
47  
48  
49  
50  
51  
52  
53  
54  
55  
56  
57  
58  
59  
60
51. Stineman MG, Ross RN, Williams S V., Goin JE, Granger C V. A functional diagnostic complexity index for rehabilitation medicine: Measuring the influence of many diagnoses on functional independence and resource use. *Arch Phys Med Rehabil.* 2000;81(5):549-557. doi:10.1053/mr.2000.5977
52. Hart T, Brenner L, Clark AN, et al. Major and minor depression after traumatic brain injury. *Arch Phys Med Rehabil.* 2011;92(8):1211-1219. doi:10.1016/j.apmr.2011.03.005
53. Colantonio A, Gerber G, Bayley M, Deber R, Yin J, Kim H. Differential profiles for patients with traumatic and nontraumatic brain injury. *J Rehabil Med.* 2011;43(4):311-315. doi:10.2340/16501977-0783
54. Williams LS, Ghose SS, Swindle RW. Depression and other mental health diagnoses increase mortality risk after ischemic stroke. *Am J Psychiatry.* 2004;161(6):1090-1095. doi:10.1176/appi.ajp.161.6.1090
55. Jackson HM, Troeung L, Martini A. Prevalence, Patterns, and Predictors of Multimorbidity in Adults With Acquired Brain Injury at Admission to Staged Community-Based Rehabilitation. *Arch Rehabil Res Clin Transl.* 2020;2(4):100089. doi:10.1016/j.arrct.2020.100089
56. Katzenellenbogen JM, Atkins E, Thompson SC, et al. Missing voices: Profile, extent, and 12-month outcomes of nonfatal traumatic brain injury in Aboriginal and non-Aboriginal adults in Western Australia using linked administrative records. *J Head Trauma Rehabil.* 2018;33(6):412-423. doi:10.1097/HTR.0000000000000371
57. Kilkenney MF, Harris DM, Ritchie EA, Price C, Cadilhac DA. Hospital management and outcomes of stroke in Indigenous Australians: Evidence from the 2009 Acute Care National Stroke Audit. *Int J Stroke.* 2013;8(3):164-171. doi:10.1111/j.1747-4949.2011.00717.x
58. Katzenellenbogen JM, Vos T, Somerford P, Begg S, Semmens JB, Codde JP. Burden of stroke in Indigenous Western Australians: A study using data linkage. *Stroke.* 2011;42(6):1515-1521. doi:10.1161/STROKEAHA.110.601799



Figure 1. Data Sources and Study Design for the ABI-REStART Study, 1991-2020. (a) Internal and External Data Sources and, (b) Study Design

401x391mm (72 x 72 DPI)

STROBE Statement—Checklist of items that should be included in reports of *cohort studies*

|                              | Item No | Recommendation                                                                                                                                                                                                                                                                                                         | Page No                    |
|------------------------------|---------|------------------------------------------------------------------------------------------------------------------------------------------------------------------------------------------------------------------------------------------------------------------------------------------------------------------------|----------------------------|
| <b>Title and abstract</b>    | 1       | (a) Indicate the study's design with a commonly used term in the title or the abstract<br>(b) Provide in the abstract an informative and balanced summary of what was done and what was found                                                                                                                          | 1,2<br>2                   |
| <b>Introduction</b>          |         |                                                                                                                                                                                                                                                                                                                        |                            |
| Background/rationale         | 2       | Explain the scientific background and rationale for the investigation being reported                                                                                                                                                                                                                                   | 4                          |
| Objectives                   | 3       | State specific objectives, including any prespecified hypotheses                                                                                                                                                                                                                                                       | 5                          |
| <b>Methods</b>               |         |                                                                                                                                                                                                                                                                                                                        |                            |
| Study design                 | 4       | Present key elements of study design early in the paper                                                                                                                                                                                                                                                                | 6                          |
| Setting                      | 5       | Describe the setting, locations, and relevant dates, including periods of recruitment, exposure, follow-up, and data collection                                                                                                                                                                                        | 6-8                        |
| Participants                 | 6       | (a) Give the eligibility criteria, and the sources and methods of selection of participants. Describe methods of follow-up<br>(b) For matched studies, give matching criteria and number of exposed and unexposed                                                                                                      | 8,9<br>n/a                 |
| Variables                    | 7       | Clearly define all outcomes, exposures, predictors, potential confounders, and effect modifiers. Give diagnostic criteria, if applicable                                                                                                                                                                               | 9                          |
| Data sources/<br>measurement | 8*      | For each variable of interest, give sources of data and details of methods of assessment (measurement). Describe comparability of assessment methods if there is more than one group                                                                                                                                   | Table 1                    |
| Bias                         | 9       | Describe any efforts to address potential sources of bias                                                                                                                                                                                                                                                              | n/a                        |
| Study size                   | 10      | Explain how the study size was arrived at                                                                                                                                                                                                                                                                              | 6                          |
| Quantitative variables       | 11      | Explain how quantitative variables were handled in the analyses. If applicable, describe which groupings were chosen and why                                                                                                                                                                                           | 9,10                       |
| Statistical methods          | 12      | (a) Describe all statistical methods, including those used to control for confounding<br>(b) Describe any methods used to examine subgroups and interactions<br>(c) Explain how missing data were addressed<br>(d) If applicable, explain how loss to follow-up was addressed<br>(e) Describe any sensitivity analyses | 10                         |
| <b>Results</b>               |         |                                                                                                                                                                                                                                                                                                                        |                            |
| Participants                 | 13*     | (a) Report numbers of individuals at each stage of study—eg numbers potentially eligible, examined for eligibility, confirmed eligible, included in the study, completing follow-up, and analysed<br>(b) Give reasons for non-participation at each stage<br>(c) Consider use of a flow diagram                        | 6<br>n/a                   |
| Descriptive data             | 14*     | (a) Give characteristics of study participants (eg demographic, clinical, social) and information on exposures and potential confounders<br>(b) Indicate number of participants with missing data for each variable of interest<br>(c) Summarise follow-up time (eg, average and total amount)                         | 10-13<br>Tables 2,4,5<br>9 |
| Outcome data                 | 15*     | Report numbers of outcome events or summary measures over time                                                                                                                                                                                                                                                         | n/a                        |

|    |                          |    |                                                                                                                                                                                                              |         |
|----|--------------------------|----|--------------------------------------------------------------------------------------------------------------------------------------------------------------------------------------------------------------|---------|
| 1  | Main results             | 16 | (a) Give unadjusted estimates and, if applicable, confounder-adjusted estimates and their precision (eg, 95% confidence interval). Make clear which confounders were adjusted for and why they were included | n/a     |
| 2  |                          |    | (b) Report category boundaries when continuous variables were categorized                                                                                                                                    | Table 4 |
| 3  |                          |    | (c) If relevant, consider translating estimates of relative risk into absolute risk for a meaningful time period                                                                                             | n/a     |
| 4  | Other analyses           | 17 | Report other analyses done—eg analyses of subgroups and interactions, and sensitivity analyses                                                                                                               | n/a     |
| 5  | <b>Discussion</b>        |    |                                                                                                                                                                                                              |         |
| 6  | Key results              | 18 | Summarise key results with reference to study objectives                                                                                                                                                     | n/a     |
| 7  | Limitations              | 19 | Discuss limitations of the study, taking into account sources of potential bias or imprecision. Discuss both direction and magnitude of any potential bias                                                   | 14      |
| 8  | Interpretation           | 20 | Give a cautious overall interpretation of results considering objectives, limitations, multiplicity of analyses, results from similar studies, and other relevant evidence                                   | 14      |
| 9  | Generalisability         | 21 | Discuss the generalisability (external validity) of the study results                                                                                                                                        | n/a     |
| 10 | <b>Other information</b> |    |                                                                                                                                                                                                              |         |
| 11 | Funding                  | 22 | Give the source of funding and the role of the funders for the present study and, if applicable, for the original study on which the present article is based                                                | 15      |

\*Give information separately for exposed and unexposed groups.

**Note:** An Explanation and Elaboration article discusses each checklist item and gives methodological background and published examples of transparent reporting. The STROBE checklist is best used in conjunction with this article (freely available on the Web sites of PLoS Medicine at <http://www.plosmedicine.org/>, Annals of Internal Medicine at <http://www.annals.org/>, and Epidemiology at <http://www.epidem.com/>). Information on the STROBE Initiative is available at <http://www.strobe-statement.org>.
